1 ***Lyl-1 regulates primitive macrophages and microglia development***

2 Shoutang Wang<sup>1, †, \*</sup>, Deshan Ren<sup>1, ††, \*</sup>, Anna-Lila Kaushik<sup>1, †††</sup>, Gabriel Matherat<sup>1, ††††</sup>, Yann  
3 Lécluse<sup>2</sup>, Dominik Filipp<sup>3</sup>, William Vainchenker<sup>1</sup>, Hana Raslova<sup>1</sup>, Isabelle Plo<sup>1</sup>, Isabelle Godin<sup>1</sup>

4  
5 <sup>1</sup> Gustave Roussy, INSERM UMR1287, Villejuif; Université Paris-Saclay, France.

6 <sup>2</sup> PFIC, IUMS AMMICA (US 23 INSERM / UMS 3655 CNRS; Gustave Roussy, Villejuif, France

7 <sup>3</sup> Laboratory of Immunobiology, Institute of Molecular Genetics of the Czech Academy of Sciences,  
8 Prague, Czech Republic.

9 Present addresses: <sup>†</sup> Department of Pathology and Immunology, Washington University School of  
10 Medicine, St. Louis, MO, 63110, USA; <sup>††</sup> Medical school of Nanjing university, Model Animal  
11 Research Center, Nanjing University, Nanjing 210093, China; <sup>†††</sup> Plasseraud IP, 33064 Bordeaux,  
12 France; <sup>††††</sup> Agence Nationale pour la Recherche, Paris, France

13 \* Equal contribution;

14  
15 **Short Title:** Lyl-1 in macrophage/microglia ontogeny

16 **Corresponding author:**

17 Isabelle Godin (ORCID: 0000-0001-8577-8388)

18 INSERM U1287; Institut Gustave Roussy-PR1; 114, rue Edouard Vaillant; 94805 VILLEJUIF Cedex;  
19 France

20 Email address: [Isabelle.Godin@gustaveroussy.fr](mailto:Isabelle.Godin@gustaveroussy.fr) ;

21 Phone: (33) 142 11 41 43; Fax: (33) 142 11 52 40

22  
23 **Key points:**

24 1- Yolk sac primitive macrophage progenitors and microglia/Border Associated macrophages  
25 express Lyl-1.

26 2- Lyl-1-deficiency impairs primitive macrophage and microglia development and leads to the up-  
27 regulation of gene sets related to embryo patterning and neuro-development.

29 **Abstract:**

30 During ontogeny, macrophages (M $\Phi$ ) populations emerge in the Yolk Sac (YS) via two distinct  
31 progenitor waves, prior to hematopoietic stem cell development. M $\Phi$ -progenitors from the  
32 primitive/"early EMP" and transient-definitive/"late EMP" waves both contribute to various  
33 resident-M $\Phi$  populations in the developing embryonic organs. Identifying factors that modulates  
34 early stages of M $\Phi$ -progenitor development may lead to a better understanding of defective  
35 function of specific resident-M $\Phi$  subsets.

36 Here we show that primitive macrophage (M $\Phi^{\text{Prim}}$ ) progenitors in the YS express Lyl-1, a bHLH  
37 transcription factor related to SCL/Tal-1. Transcriptomic analysis of YS M $\Phi$ -progenitors indicated  
38 that M $\Phi^{\text{Prim}}$  progenitors present at embryonic day (E) 9 are clearly distinct from those present at  
39 later stages. Disruption of Lyl-1 basic helix-loop-helix domain led initially to an early increased  
40 emergence of M $\Phi^{\text{Prim}}$  progenitors, and later to their defective differentiation. These defects were  
41 associated with a disrupted expression of gene sets related to embryonic patterning and  
42 neurodevelopment. Lyl-1-deficiency also induced a reduced production of mature M $\Phi$ /microglia  
43 in the early brain, as well as a transient reduction of the microglia pool at midgestation and in the  
44 newborn.

45 We thus identify Lyl-1 as a critical regulator of M $\Phi^{\text{Prim}}$  and microglia development, which  
46 disruption may impair resident-M $\Phi$  function during organogenesis.

47

48

## 49 **INTRODUCTION**

50 Amongst the components of the transcription factor network that regulate hematopoietic cells  
51 features, *Tal-1*, *Lmo2*, *Runx1* and *Gata2* stand out as major regulators of hematopoietic progenitor  
52 development.<sup>1, 2</sup> *Tal-1*, *Lmo2* and *Gata-2* belong to a transcriptional complex, which also includes  
53 the basic helix-loop-helix (bHLH) transcription factor (TF) lymphoblastic leukemia-derived  
54 sequence 1 (*Lyl-1*). Unlike its paralog *Tal-1*, which is mandatory for the specification of all  
55 hematopoietic progenitors<sup>3, 4</sup>, *Lyl-1* roles during developmental hematopoiesis remains poorly  
56 characterized. We analyzed these functions at the onset of YS hematopoietic development using  
57 *Lyl-1*<sup>LacZ/LacZ</sup> mutant mice.<sup>5</sup>

58 During ontogeny, hematopoietic progenitors are generated in three successive and overlapping  
59 waves.<sup>6, 7</sup> The emergence of the Hematopoietic Stem Cells (HSC) that will maintain lifelong  
60 hematopoiesis in the adult occurs at mid-gestation in the third and definitive hematopoietic wave.  
61 HSC generated in the aorta region immediately migrate to the fetal liver (FL) where they mature  
62 and amplify before homing to the bone marrow before birth.<sup>8, 9</sup> Prior to HSC generation, the  
63 production of blood cells relies on two hematopoietic waves provided by the YS. This HSC-  
64 independent hematopoiesis comprises first the primitive hematopoietic wave, with the transient  
65 production of progenitors with embryonic specific features: From Embryonic day (E) 7.00, the YS  
66 produces monopotent progenitors for erythrocytes, megakaryocytes and macrophages (MΦ)<sup>10, 11</sup>,  
67 along with bipotent Erythro-Megakaryocytic (EMk) progenitors<sup>12</sup>, in a *Myb*-independent  
68 pathway.<sup>13, 14</sup> The second YS wave, called transient-definitive, provides for a limited duration  
69 progenitors (mostly erythro-myeloid) that seed the FL and produce a hematopoietic progeny that  
70 displays definitive/adult differentiation features. Erythro-myeloid cell production in this wave  
71 occurs in a *Myb*-dependent pathway, through the progressive differentiation of erythro-myeloid  
72 progenitors (EMP) in a pathway similar to the adult one.<sup>6</sup> As primitive and transient definitive YS

73 waves both produce cells from erythro-myeloid lineages, they are also termed respectively “early  
74 EMP” and “late EMP”.<sup>15, 16</sup>

75 Considering the M $\Phi$  lineage, fate-mapping approaches aimed at determining the embryonic  
76 origin of resident-M $\Phi$ s indicated that most tissues harbor resident-M $\Phi$ s of diverse origins (YS, FL  
77 and adult bone marrow)<sup>15, 17, 18</sup>, which complicates the characterization of wave-dependent  
78 functions of the various subsets. However, these fate-mapping analyses established that, contrary  
79 to others tissue, brain M $\Phi$ s (microglia and Border Associated M $\Phi$  (BAM)) develop only from YS-  
80 derived M $\Phi$ -progenitors<sup>14, 16, 19, 20, 21</sup>, confirming a model we previously put forward.<sup>22</sup> Due to the  
81 coexistence of two waves in the YS, the origin of microglia has been debated (reviewed in<sup>6, 15, 18,</sup>  
82 <sup>23</sup>). An origin of microglia from M $\Phi$ -progenitors from the primitive/“early EMP” wave was  
83 supported by microglia labelling following an early (E7.0-E7.5) CRE-mediated induction of Runx1<sup>19</sup>  
84 and by the intact microglia pool in *Myb*-deficient mice.<sup>14, 21</sup> The origin of microglia was also  
85 attributed to the primitive wave in zebrafish embryos, since in M $\Phi$ <sup>Prim</sup> progenitors arise in this  
86 species from a location distinct from other hematopoietic progenitors.<sup>24, 25, 26</sup> Finally, the normal  
87 microglia development in mice lacking Kit ligand, leading to an impaired EMP development and  
88 the depletion of resident-M $\Phi$ s in the skin, lung and liver supports this model.<sup>27</sup>

89 We here show that, at the early stages of YS hematopoiesis, *Lyl-1* expression characterizes  
90 primitive M $\Phi$ -progenitors. Through RNA-seq. analyses, it appears that these primitive M $\Phi$ -  
91 progenitors harbor an immune-modulatory phenotype, while those produce at a later stage favor  
92 the inflammatory signaling which promotes the emergence of HSC in the third and definitive  
93 hematopoietic wave.<sup>28</sup>

94 Our results also indicate that in the brain, *Lyl-1* is expressed in the entire microglia/BAM cell  
95 population at the onset of brain colonization and appeared to regulate microglia/BAM  
96 development.



97        Altogether, these data point to Lyl-1 as a major regulator of early embryonic M $\Phi$ -progenitors  
98        development and advocate for further analyses to more precisely delineate Lyl-1 function during  
99        the development of resident-M $\Phi$ s in homeostatic and pathological contexts.

100

101 **RESULTS AND DISCUSSION**

102

103 ***Lyl-1* expression marks  $M\Phi^{Prim}$  progenitors from the early YS**

104 *Lyl-1* being expressed in the YS from the onset of YS hematopoiesis<sup>29</sup>, we first explored its  
105 function by characterizing the clonogenic potential of WT, *Lyl-1*<sup>WT/LacZ</sup> and *Lyl-1*<sup>LacZ/LacZ</sup> YS. E8-YS  
106 were maintained in organ culture for 1 day (E8 OrgD1-YS), allowing only the development of  
107 primitive and transient-definitive progenitors.<sup>30, 31</sup> Compared to WT, the production of  $M\Phi$   
108 colonies was increased in *Lyl-1*<sup>WT/LacZ</sup> and *Lyl-1*<sup>LacZ/LacZ</sup> OrgD1-YS. Otherwise, the clonogenic  
109 potential and colony distribution were unmodified (**Figure 1A**).

110 Using FACS-Gal assay, we noticed that the entire  $M\Phi$ -progenitor population ( $Kit^+CD45^+CD11b^+$ )  
111 expressed *Lyl-1* at E9. In contrast, two  $M\Phi$ -progenitor subsets, discriminated by FDG/*Lyl-1*  
112 expression, were present after E9.5 (**Figure 1B**). Since after E9.5, the YS harbors both  $M\Phi^{Prim}$  and  
113 transient-definitive ( $M\Phi^{T-Def}$ )  $M\Phi$ -progenitors, and as these progenitors subsets cannot be  
114 discriminated by phenotype,<sup>11</sup> we investigated the known features discriminating these two  
115 waves: the origin from monopotent progenitors for  $M\Phi^{Prim}$  progenitors<sup>10, 11</sup> and the *Myb*-  
116 dependent<sup>14, 32</sup> differentiation of  $M\Phi^{T-Def}$  progenitors from EMP, via the production of granulo-  
117 monocytic (GM-), then granulocyte (G-) and  $M\Phi$ -progenitors.<sup>6</sup>

118 At E8 (0-5 somites (S)), the YS only harbors  $M\Phi^{Prim}$  progenitors, harboring a  $CD11b^+CD31^+$   
119 phenotype.<sup>11</sup> At this stage, all  $M\Phi$ -progenitors expressed FDG/*Lyl-1* (**Figure 1C**). Most  $FDG^+/Lyl-1^+$   
120  $CD11b$  and  $CD31$  cells ( $69.27\pm 0.33\%$ ) from *Lyl-1*<sup>WT/LacZ</sup> E8-YS reliably produced  $M\Phi$  colonies  
121 ( $72.78\pm 9.65\%$ ; n=3) in clonogenic assays, amounting 1-4  $M\Phi$  progenitors per YS, a value consistent  
122 with previously published data.<sup>10, 11</sup>

123 *Lyl-1* expression by  $M\Phi^{Prim}$  progenitors was strengthened by RT-qPCR comparison of *Myb*  
124 expression: Both E9-YS  $M\Phi^{Prim}$  progenitors and  $FDG^+/Lyl-1^+$  progenitors from E10-YS expressed low

125 *Myb* levels strengthening their primitive status, while  $\text{FDG}^-/\text{Lyl-1}^-$  progenitors from E10-YS  
126 progenitors displayed *Myb* levels similar to lineage-negative  $\text{Sca1}^+\text{cKit}^+$  progenitors from E12-FL  
127 **(Figure 1D)**.

128 The differentiation potential of  $\text{FDG}^+/\text{Lyl-1}^+$  and  $\text{FDG}^-/\text{Lyl-1}^-$  fractions of  $\text{Ter119}^-\text{Kit}^+\text{CD45}^+\text{CD11b}^+$   
129 myeloid progenitors isolated from E10-YS also pointed to *Lyl-1* expression by  $\text{M}\Phi^{\text{Prim}}$  progenitors  
130 **(Figure 1E)**: Similar to WT E9-YS  $\text{M}\Phi^{\text{Prim}}$  progenitors, E10  $\text{FDG}^+/\text{Lyl-1}^+$  progenitors appeared  
131 monopotent, as they nearly exclusively produced  $\text{M}\Phi$  colonies. In contrast, E10  $\text{FDG}^-/\text{Lyl-1}^-$   
132 myeloid progenitors produced GM, G and  $\text{M}\Phi$  colonies, a feature typical of transient-definitive  
133 progenitors<sup>6</sup>. Overall, these data together suggested that *Lyl-1* may mark  $\text{M}\Phi^{\text{Prim}}$  progenitors from  
134 the earliest wave.

135

### 136 **Distinct features of WT $\text{M}\Phi$ -progenitors at E9 and E10**

137 The distinction between E9 and E10  $\text{M}\Phi$ -progenitors was confirmed in RNA-seq. analysis of  
138  $\text{CD45}^+\text{CD11b}^+\text{Kit}^+$   $\text{M}\Phi$ -progenitors sorted at E9 ( $\text{M}\Phi^{\text{Prim}}$  progenitors) and E10 ( $\text{M}\Phi^{\text{Prim}}$  and  $\text{M}\Phi^{\text{T-Def}}$   
139 progenitors). Principal Component Analysis separated E9 and E10  $\text{M}\Phi$ -progenitors according to  
140 stage and genotypes **(Figure 2A)**. E9 and E10 WT  $\text{M}\Phi$ -progenitors differed by the expression of  
141 726 genes, 176 were up-regulated at E9 and 550 at E10. Considering the coexistence of  $\text{M}\Phi^{\text{Prim}}$   
142 and  $\text{M}\Phi^{\text{T-Def}}$  progenitors in E10-YS, differentially expressed genes (DEGs) found at E10 may reflect  
143 wave-specific differences or stage-dependent changes related to  $\text{M}\Phi^{\text{Prim}}$  progenitor maturation.

144 Overlapping the identified DEGs to the EMP and E10.25-E10.5  $\text{M}\Phi$ s signatures obtained by  
145 Mass *et al.*<sup>33</sup> confirmed that WT E9  $\text{M}\Phi^{\text{Prim}}$  progenitors were distinct from these two populations,  
146 since none of the 176 upregulated at E9 belonged to these signatures. Comparatively, about 5%  
147 of the genes up-regulated at E10 belonged to the EMP and  $\text{M}\Phi$  signatures **(Figure 2B)**. A similar

148 separation was observed in GSEA analyses (**Supplemental figure 1B**). These observations suggest  
149 that within E10 M $\Phi$ -progenitors some, likely the M $\Phi$ <sup>T-Def</sup> ones, retain part of the EMPs signature.

150 In a WT context, E9 M $\Phi$ <sup>Prim</sup> progenitors differed from E10 M $\Phi$ -progenitors by their TF  
151 repertoire. Genes regulating erythroid development (*Gata1*, *Gata2*, *Klf1*) and globin genes,  
152 embryonic (*Hbb-bh1*, *Hba-x*, *Hbb-y*) and definitive (*Hba-a2*, *Hba-a1*, *Hbb-bt*) were enriched at E10  
153 (**Figure 2B**), while *Spi1*/PU.1 was highly expressed compared to *Gata1* at both stages (**Figure 2C**).  
154 The lower expression level at E9 of erythroid genes and of genes involved in granulo-monocytic  
155 (*Mpo*, *Csf2r*/*GM-CSF receptors*, *Cebp*, *Jun*) and megakaryocytic development (*Pf4*, *TPO signaling*)  
156 (**Figure 2B; Supplemental table 1**) sustains the monopotent/primitive status of E9 M $\Phi$   
157 progenitors, and suggests that M $\Phi$ <sup>T-Def</sup> progenitors may retain the expression of genes that  
158 characterize their EMP ancestor.

159 IPA and GSEA analyses indicated that E9 M $\Phi$ <sup>Prim</sup> progenitors were more active in Eicosanoid  
160 signaling than E10 progenitors (**Figure 2D**). They were also enriched in type I interferon (IFN)  $\beta$  and  
161 type II IFN $\gamma$  signaling (**Figure 2E**) and in MHC-II related genes, especially *Cd74* (top 1 IPA network)  
162 (**Figure 2F; supplemental figure 1C**). Cytometry analyses confirmed a low, but significant,  
163 enrichment of MHC-II expression at E9, compared to E10 (**Supplemental figure 1D**).  
164 Comparatively, E10 M $\Phi$ -progenitors were more active in inflammatory signaling (**Figure 2D, E;**  
165 **supplemental figure 1C, E-G; supplemental table 1**), and metabolically active (**Supplemental table**  
166 **1**). The complement cascade and phagocytosis also prevailed at E10 (**Supplemental figure 1H-I**).

167 Altogether, the signature for WT E9 M $\Phi$ <sup>Prim</sup> progenitors points to an immuno-modulatory  
168 function, while E10 M $\Phi$ -progenitors appear involved in phagocytosis and inflammatory signaling.  
169 Interestingly, inflammatory signaling has been revealed as a key factor favoring embryonic HSC  
170 emergence (reviewed in<sup>34</sup>). The source of inflammatory signals was further identified as M $\Phi$

171 progenitors expressing *Mrc1*/CD206<sup>35</sup>, a marker up-regulated in E10 WT MΦ-progenitors  
172 compared to E9 (**Figure 2B**).

173

#### 174 ***Lyl-1* deficiency impacts embryonic development**

175 When evaluating the effect of *Lyl-1*-deficiency at the earliest stage of MΦ<sup>Prim</sup> development,  
176 clonogenic assays pointed to an increased production of MΦ-progenitors in Mutant E8-YS  
177 compared to WT (**Figure 3A**), concordant with our first observation (**Figure 1A**). At this stage, the  
178 increased size of the initial MΦ-progenitor pool appeared to result from an elevated commitment  
179 of mesodermal/pre-hematopoietic cells to a MΦ fate, rather than from a defective differentiation  
180 (**Supplemental figure 2 A-D and related information**). The high increase of *Itga2b*/CD41  
181 expression level in E9 *Lyl-1*<sup>LacZ/LacZ</sup> MΦ<sup>Prim</sup> progenitors (**Figure 3B**) may reflect this elevated  
182 commitment. *Lyl-1* expression in YS mesoderm<sup>29</sup>, where it cannot substitute for *Tal-1* mandatory  
183 function for the generation of hematopoietic progenitors<sup>4</sup>, was already established<sup>3</sup>. Recently, *Lyl-*  
184 *1* was identified as a regulator of mesoderm cell fate<sup>36</sup> and of the maintenance of primitive  
185 erythroid progenitors.<sup>37</sup>

186 The TF network that controls developmental hematopoiesis<sup>2</sup> was also modified (**Figure 3C**):  
187 beside the expected reduction of *Lyl-1* expression, the expression of *Lmo2*, a *Lyl-1* target<sup>38</sup>, was  
188 down-regulated, while *Tal-1* up-regulation might reflect some compensatory function.<sup>3</sup> The  
189 consequences were apparent in GSEA analyses: both pathways and GO terms uncovered an up-  
190 regulation of signaling pathways involved in embryo patterning (Wnt, Hox and Smad) in *Lyl-*  
191 *1*<sup>LacZ/LacZ</sup> MΦ-progenitors, as well as a highly modified collagen, integrin and cadherin usage  
192 (**Supplemental table 2**). Accordingly, developmental trajectories were affected (**Figure 3D**), with  
193 the up-regulation in E9 *Lyl-1*<sup>LacZ/LacZ</sup> MΦ-progenitors of gene sets related to "anterior-posterior

194 pattern specification" and "anatomical structure formation involved in morphogenesis", notably  
195 skeletal and nervous system development.

196 GSEA and KEGG comparison of *Lyl-1*<sup>LacZ/LacZ</sup> and WT MΦ-progenitors at E10 highlighted another  
197 patterning modification, namely the down-regulation of gene sets involved in heart development  
198 (**Supplemental figure 2E; supplemental table 3**), which might stem from a defective MΦ  
199 development. The heart harbors three resident-MΦ subsets, two of which originate from the YS.<sup>39</sup>  
200 Amongst the features that distinguish WT E9 MΦ<sup>Prim</sup> progenitors from E10 MΦ-progenitors, the  
201 enriched expression of MHC-II (**Figure 2F**) and poor expression of phagocytosis-related genes  
202 (**Supplemental figure 1I**) at E9 also characterize one of the two YS-derived CCR2<sup>-</sup> resident-MΦ  
203 subsets in the heart.<sup>39, 40</sup> Therefore, a function for *Lyl-1*<sup>+</sup> MΦ<sup>Prim</sup> progenitors in heart development  
204 may be considered. This observation reinforces the need to better characterize the contributions  
205 of MΦ-progenitors from both primitive and transient-definitive waves to tissues harboring YS-  
206 derived resident-MΦs.

207 The patterning defects highlighted in defective MΦ<sup>Prim</sup>, might be responsible, at least in part,  
208 for the significantly decreased litter size and increased perinatal lethality observed in *Lyl-1*<sup>LacZ/LacZ</sup>  
209 mice compared to WT (**Supplemental figure 2F**), which indicates the requirement for *Lyl-1* during  
210 various developmental processes.

211

### 212 **Defective MΦ<sup>Prim</sup> development in *Lyl-1* mutant YS**

213 The analysis of *Lyl-1* expression in A1-A2-A3 subsets from *Cx3cr1*<sup>WT/GFP</sup> YS indicated that *Lyl-1* is  
214 expressed throughout MΦ-progenitor differentiation, with levels decreasing from A1 to A3  
215 (**Supplemental figure 3A**). We monitored the distribution of A1-A2 and A3 MΦ subsets  
216 (**Supplemental figure 2A**) at E10-YS, when all three subsets are present, using the *Cx3cr1*<sup>WT/GFP</sup>:*Lyl-1*<sup>LacZ/LacZ</sup>  
217 strain. While the size of the whole MΦ population was not overtly modified, *Lyl-1*-

218 deficiency impacted the subset distribution, with increased A1 and reduced A2 and A3 pool sizes  
219 **(Figure 4A)**. *Lyl-1* appears to regulate M $\Phi$ -progenitor differentiation towards mature M $\Phi$ s. This  
220 defect could result from the altered cytokine signaling uncovered in E9 mutant progenitors  
221 through GSEA and IPA analyses **(Figure 4B; supplemental figure 3B)**. A limited or delayed  
222 differentiation of E9 M $\Phi^{\text{Prim}}$  progenitors was supported by the down-regulated *Spi1*/PU.1 signaling  
223 pathway **(Supplemental figure 3C; Supplemental table 4B)** and the decreased expression of  
224 *Ptprc*/CD45, *Csfr1*, *Itgam*/CD11b and CD33 **(Figure 4C)**.

225 Within the M $\Phi$  lineage, *Lyl-1* function during normal development would initially consist to  
226 restrict the size of the M $\Phi^{\text{Prim}}$  progenitor pool and/or the duration of its production, which is  
227 transient<sup>6</sup>, as indicated by the maintenance of the intermediate mesoderm to M $\Phi$ -progenitor pool  
228 observed in *Lyl-1<sup>LacZ/LacZ</sup>* E8-YS. Indeed, the increased size of the M $\Phi$ -progenitor pool in E8-E9 YS  
229 appears independent from the defective/delayed differentiation of M $\Phi$ -progenitors observed at  
230 E10, since this process starts after E9.5.<sup>10, 11, 15</sup> Subsequently, the increased size of M $\Phi^{\text{Prim}}$   
231 progenitor pool in E10 *Lyl-1<sup>LacZ/LacZ</sup>* YS likely results from a defective/delayed differentiation  
232 mediated by a defective cytokine signaling, implying that during normal development, *Lyl-1* would  
233 promote the differentiation of M $\Phi^{\text{Prim}}$  progenitors.

234 *Lyl-1<sup>LacZ/LacZ</sup>* M $\Phi$ -progenitors were also deficient in the IFN signaling that characterize E9 M $\Phi^{\text{Prim}}$   
235 progenitors, notably *Irf8*, a factor involved in YS-M $\Phi$  and microglia development<sup>21, 41</sup> **(Figure 4D)**.  
236 Compared to WT, M $\Phi$ -progenitors from *Lyl-1<sup>lacZ/lacZ</sup>* E9-YS up-regulated the LXR/RXR activation  
237 pathway **(Figure 4E)** and metabolic pathways, some enriched WT M $\Phi$ -progenitors at E10  
238 (Butanoate, steroid) **(Supplemental table 1)**, and other not (Fructose/mannose, fatty acid) **(Figure**  
239 **3D)**. They were also less active in inflammatory signaling pathways, particularly through NF $\kappa$ b, a  
240 factor known to interact with *Lyl-1*<sup>42</sup>, and in TLR signaling **(Figure 4D; supplemental figure 3B, D-**  
241 **E; supplemental table 4B)**. Overlapping the DEGs identified in *Lyl-1<sup>LacZ/LacZ</sup>* M $\Phi$ -progenitors at E9

242 and E10 identified the core signature of *Lyl-1*-deficiency, independent of the maturation occurring  
243 between these stages (**Figure 4F**).

244 Unfortunately, the co-existence of  $M\Phi^{\text{Prim}}$  and  $M\Phi^{\text{T-Def}}$  progenitors in E10-YS complicates the  
245 attribution of gene expression changes to a stage-dependent maturation of  $M\Phi^{\text{Prim}}$  progenitors or  
246 to a signature specific to  $M\Phi^{\text{T-Def}}$  progenitors. However, most pathways favored by E10 progenitors  
247 were insensitive to *Lyl-1*-deficiency, except TLR signaling pathway that was down-regulated in E9  
248 *Lyl-1<sup>LacZ/LacZ</sup>* progenitors, compared to WT.

249  
250 ***Lyl-1-expressing MΦ-progenitors contribute to the fetal liver and brain***

251 The FL<sup>9</sup> and brain<sup>19, 22</sup> are colonized as early as E9 by YS-derived resident-MΦ progenitors. We  
252 evaluated the contribution of *Lyl-1*-expressing  $M\Phi^{\text{Prim}}$  progenitors to these rudiments at E10  
253 (**Figure 5A**). While E10-YS comprised  $FDG^+/Lyl-1^+$  and  $FDG^-/Lyl-1^-$  MΦ-progenitors and mature  
254 ( $F4/80^+$ ) MΦ subsets (**Figure 1B**), the brain from the same embryos essentially harbored  $FDG^+/Lyl-$   
255  $1^+$  MΦ-progenitors and MΦs. In contrast, both  $FDG^+/Lyl-1^+$  and  $FDG^-/Lyl-1^-$  MΦ-progenitors were  
256 present in E10-FL, as in E10-YS, and MΦ-progenitors were more abundant in mutant FL than in WT  
257 (**Figure 5B**).

258 We next focused on brain MΦs during the colonization stage, which lasts until E11.<sup>43</sup> At this  
259 stage, microglia and perivascular, meningeal and choroid plexus MΦσ, collectively referred to as  
260 BAMs, are all located in the brain mesenchyme and therefore undistinguishable.<sup>16, 44</sup> FACS-Gal  
261 assay demonstrated that the whole  $F4/80^+$  microglia/BAM expressed *Lyl-1* throughout the  
262 settlement period (**Figure 5C**). The presence of  $FDG^+/Lyl-1^+F4/80^+$  microglia/BAM at early stage of  
263 brain colonization suggests that MΦs could participate to this step.

264  $Lyl-1^+$   $M\Phi^{\text{Prim}}$  progenitors and early microglia/BAM shared similar features, such as an early  
265 appearance timing and low level of *Myb* expression (**Figure 5D**), concordant with a *Myb-*



266 independent development of microglia.<sup>14, 21</sup> *Lyl-1* was also similarly expressed in A1-A2 and A3 MΦ  
267 subsets from the YS and brain (**Figure 5E; supplemental figure 3A**). *Lyl-1*-deficiency impacted the  
268 distribution of MΦs subsets in E10 *Cx3cr1*<sup>WT/GFP</sup>:*Lyl-1*<sup>LacZ/LacZ</sup> brain: an increased A1 and a reduced  
269 A3 pool size indicated that *Lyl-1* regulates MΦ-progenitor differentiation in both YS and brain  
270 (**Figure 5F**).

271 The proximity between YS MΦ<sup>Prim</sup> progenitors and microglia was also apparent in RNA-seq.  
272 data: E9 WT MΦ<sup>Prim</sup> progenitors expressed significantly lower *Mrc1*/CD206 and higher *Sall3* levels  
273 than E10 MΦ-progenitors, and a slightly increased *Sall1* level (**Figure 5G**), a transcriptomic pattern  
274 that characterizes microglia.<sup>33, 43, 45</sup> This partial bias toward a microglia signature suggests that the  
275 first stage of microglia development program is already initiated in MΦ<sup>Prim</sup> /“early  
276 EMP”progenitors in E9-YS.

277

### 278 ***Lyl-1* inactivation impairs microglia development at two development stages**

279 Having defined *Lyl-1* implication during microglia/BAM settlement in the brain, we turned to  
280 later development stages. Cytometry and database analyses<sup>43</sup> confirmed the continuous  
281 expression of *Lyl-1* in CD45<sup>low</sup> microglia until adulthood (**Supplementary figure 4A**). *LYL-1*  
282 expression was also reported in microglia from healthy murine and human adults.<sup>46, 47, 48, 49</sup> We  
283 examined the impact of *Lyl-1*-deficiency on microglia pool size during development. Microglia  
284 quantification pointed to E12 as the first step impacted. The arrested increase of microglia pool in  
285 *Lyl-1*<sup>LacZ/LacZ</sup> brain at E12 (**Figure 6A**) resulted from a reduced proliferation (**Figure 6B**) rather than  
286 an increased apoptosis (**Supplementary figure 4B**). Moreover, *Lyl-1*-deficiency provoked  
287 morphological changes in E12 *Cx3cr1*<sup>WT/GFP</sup>:*Lyl-1*<sup>LacZ/LacZ</sup>, compared to *Cx3cr1*<sup>WT/GFP</sup> microglia,  
288 namely a reduced number and extent of ramifications (**Figure 6C; supplementary figure 4C-D**).

289 From E14, the microglia pool size returned to levels similar to WT (**Figure 6A**), probably due to the  
290 highly reduced apoptosis level in *Lyl-1<sup>LacZ/LacZ</sup>* microglia at E14 (**Supplementary figure 4B**).

291 P0-P3 was identified as a second stage altered in *Lyl-1<sup>LacZ/LacZ</sup>* microglia. At birth, the cellularity  
292 of *Lyl-1<sup>LacZ/LacZ</sup>* brain was significantly decreased compared to WT (**Figure 6D**), which was not the  
293 case at earlier stages (**Supplementary figure 4E**). CD11b<sup>+</sup> cells recovery was also reduced (WT:  
294  $140.96 \pm 0.91 \times 10^3$ , n=9; *Lyl-1<sup>LacZ/LacZ</sup>*:  $87.18 \pm 0.37 \times 10^3$ , n=9). Consequently, *Lyl-1*-deficiency triggered  
295 a nearly 2-fold reduction of the microglia population (**Figure 6D**). This perinatal reduction of  
296 microglia appeared transient, since no difference with WT brain was observed in the adult  
297 (**Supplementary figure 4F**). Transient decreases of microglia pool size, such as those we observed  
298 at E12 and P0-P3 in *Lyl-1<sup>LacZ/LacZ</sup>* mutant, have been reported to occur during normal development  
299 in postnatal weeks 2-3<sup>50</sup>, but also in *Cx3cr1* mutant mice during the 1<sup>st</sup> postnatal week<sup>51</sup>. This  
300 indicates a highly dynamic control of the microglia pool size during key steps of neural  
301 development that seems preserved in *Lyl-1* mutant, with the exception of the E12 and P0-P3 time-  
302 points. At this later stage, the reduction of brain cellularity in *Lyl-1<sup>LacZ/LacZ</sup>* mice points to *Lyl-1* as a  
303 possible regulator of the trophic function of microglia on brain cells<sup>52, 53</sup>.

304 The identification of E12 and P0-P3 as key stages for *Lyl-1* function in microglia development  
305 was confirmed by RT-qPCR analyses of the expression of genes essential for MΦs (*Spi1/PU.1*, *Csf1r*,  
306 *Mafb*) and/or microglia (*Runx1*, *Cx3cr1*, *Irf8*) development and function, of known regulators of  
307 developmental hematopoiesis (*Tal-1*, *Lmo2*, *Runx1*) and related factors (*Tcf3/E2A*, *Tcf4/E2.2*)  
308 (**Figure 6E-F; supplementary figure 4G**). Time-course analyses highlighted the down-regulation of  
309 *Csf1r*, *Irf8* and *Lmo2* in *Lyl-1<sup>LacZ/LacZ</sup>* microglia at E12 and P0-P3, while *Cx3cr1* was only decreased at  
310 E12 (**Figure 6G**). Note that *Lyl-1* expression was unmodified in *Cx3cr1<sup>GFP/GFP</sup>* mutants (**Figure 6G**).  
311 Interestingly, *Cx3cr1*, as well as *Irf8* and *Lmo2*, belong to potential *Lyl-1* target genes.<sup>2</sup>

312 *Mafb* expression levels in *Lyl-1<sup>LacZ/LacZ</sup>* microglia transiently decreased at P0-P3 and later returned  
313 back to WT expression levels (**Figure 6H**). As *Mafb* represses resident-M $\Phi$  self-renewal<sup>54</sup>, the  
314 recovery of a normal amount of microglia after birth may stem from this transient decrease.  
315 *Spi1/PU.1*, *Tcf3/E2A* and *Tcf4/E2.2* expression levels were unmodified in *Lyl-1<sup>LacZ/LacZ</sup>* microglia,  
316 while *Runx1* expression was only affected after birth. *Tal-1* expression was decreased at E14 and  
317 increased after birth, suggesting that this *Lyl-1* paralog<sup>3</sup> does not compensate *Lyl-1*-deficiency  
318 during embryonic stages, but may do so at postnatal stages (**Supplementary figure 4G**).  
319 Remarkably, RNA-seq. results indicated that some genes deregulated in *Lyl-1<sup>LacZ/LacZ</sup>* microglia at  
320 E12 and P0-P3 were also down-regulated in *Lyl-1<sup>LacZ/LacZ</sup>* M $\Phi$ -progenitors at E9 (*Csfr1*:  
321 **Supplementary figure 3C**, *Lmo2*: **Figure 3C**; *Irf8*: **Figure 4D**; *Cx3cr1*: **Figure 6I**). These deregulations  
322 were transient, however in both locations and stages they coincided with a defective M $\Phi$ /microglia  
323 differentiation.

324 Other genes enriched in microglia (*Fcrls*, *Mef2c*, *Maf*)<sup>55</sup> or involved in the maintenance of  
325 microglia homeostasis (*P2ry12*)<sup>56</sup> were also expressed in E9 *Lyl-1<sup>LacZ/LacZ</sup>* M $\Phi$ -progenitors at a lower  
326 level than in the WT, except *Lpr8* and *Aif-1/Iba1* (**Figure 6I**). These deregulations highlight again  
327 shared features between M $\Phi$ <sup>Prim</sup> progenitors and microglia/neural development which became  
328 apparent upon *Lyl-1* inactivation considering the large number of neural signaling pathways up-  
329 regulated in E9 *Lyl-1<sup>LacZ/LacZ</sup>* M $\Phi$ -progenitors (**Figure 3D**) and the relationship of the DEGs enriched  
330 in E9 M $\Phi$ <sup>Prim</sup> progenitors with brain formation and neuro-development uncovered in IPA analysis  
331 (**Supplementary figure 4H**).

332 Based on the gene expression pattern of *Lyl-1*-deficient microglia and the signature of M $\Phi$ <sup>Prim</sup>  
333 progenitors in the early YS, a contribution of *Lyl-1*-deficiency to neurodevelopmental disorders may  
334 be considered. Synaptic pruning and neural maturation, which characterize the perinatal phase of  
335 microglia development<sup>43</sup>, might be impaired in *Lyl-1<sup>LacZ/LacZ</sup>* embryos considering the defects

336 observed at P0-P3, the later key developmental stage regulated by Lyl-1. Indeed, *Lyl-1* deregulation  
337 has been observed in datasets reporting pathological models of brain myeloid cells ([http://research-](http://research-pub.gene.com/BrainMyeloidLandscape/#Mouse-gene/Mouse-gene/17095/geneReport.html)  
338 [pub.gene.com/BrainMyeloidLandscape/#Mouse-gene/Mouse-gene/17095/geneReport.html](http://research-pub.gene.com/BrainMyeloidLandscape/#Mouse-gene/Mouse-gene/17095/geneReport.html))<sup>57</sup>, as  
339 well as in human neuropathies<sup>58, 59</sup>, including the 19p13.13 micro-deletion neuro-developmental  
340 disabilities.<sup>60</sup> However, since Lyl-1 is expressed in endothelial cells, including in the brain<sup>61</sup>, a  
341 contribution of *LYL-1*-deficient endothelial cells to these diseases must be considered.

342 Altogether, our findings reveal Lyl-1 as a key factor regulating the production and differentiation  
343 of YS M $\Phi$ -progenitors and the development of microglia. Lyl-1 is the least studied partners of the  
344 transcription factor complex that regulates developmental hematopoiesis. The development of  
345 more appropriate models is required to precise Lyl-1 functions in microglia and determine its role  
346 in the development of other resident-M $\Phi$ s populations.

347

348 **MATERIALS AND METHODS**

349 **Mice.** The following mouse strains were used: C57BL/6 (Charles Rivers Laboratories), called wild  
350 type (WT); *Lyl-1<sup>LacZ,5</sup>*; *Cx3cr1<sup>GFP,62</sup>*; *Cx3cr1<sup>GFP/GFP</sup>:Lyl-1<sup>LacZ/LacZ</sup>* double knock-in strain (breeding  
351 schemes: **supplemental information**). Experiments were conducted in compliance with  
352 French/European laws, under authorized project #2016-030-5798, approved by officially  
353 accredited local institutional animal (committee n°26) and French “Ministère de la Recherche”  
354 ethics boards.

355

356 **Tissues.** E7.5-E10.5 YS and E10-FL were dissected as described.<sup>9, 63</sup> For cytometry analyses, whole  
357 E9-E11 brains were prepared as described.<sup>22</sup> After E12, microglia were recovered following Percoll  
358 (Sigma) separation, as described.<sup>64</sup> The number of microglia per brain was estimated by reporting  
359 the percentage of CD11b<sup>+</sup>CD45<sup>low</sup>F4/80<sup>+</sup> microglia to the cellularity of the corresponding sample.

360

361 **Tissue culture.** YS explants, maintained for 1 day in organ culture in plates containing  
362 OptiMEM+Glutamax, 1% Penicillin-streptomycin, 0.1% β-mercaptoethanol (ThermoFisher) and  
363 10% fetal calf serum (Hyclone), are referred to as OrgD1-YS.

364 In clonogenic assays, YS suspension or sorted cells were plated in triplicate (3x10<sup>3</sup> or 100-150  
365 cells/mL) in Methocult® M3234 (StemCell Technologies) always supplemented the cytokines  
366 listed in **supplemental table 5**. Colonies were scored at day 5 for primitive erythroblasts and day  
367 7 for other progenitors.

368

369 **Flow cytometry.** Cells, stained with antibodies listed in **supplemental table 6**, for 30 min. on ice,  
370 were acquired (Canto II) or sorted (FACS-Aria III or Influx, BD Biosciences) and analyzed using  
371 FlowJo (Treestar) software.

372 The  $\beta$ -Galactosidase substrate fluorescein di- $\beta$ -galactopyranoside (FDG; Molecular probe), was  
373 used as reporter for *Lyl-1* expression in FACS-Gal assay.<sup>65,66</sup> For apoptosis analysis, microglia were  
374 immune-stained and incubated with Annexin V-FITC. 7AAD was added before acquisition. For  
375 proliferation assays, pregnant females (12 gestational days) were injected with BrdU (10 $\mu$ M) and  
376 sacrificed 2 hours later. Microglia were isolated, immune-stained and prepared according to kit  
377 instruction (BD Pharmingen 552598). BrdU incorporation was revealed using anti-BrdU-APC.

378

379 **Brain imaging.** To assess microglia morphology, the midbrain was dissected from *Cx3cr1*<sup>WT/GFP</sup>:*Lyl-*  
380 *1*<sup>WT/WT</sup> and *Cx3cr1*<sup>WT/GFP</sup>:*Lyl-1*<sup>LacZ/LacZ</sup> embryos, immune-labeled and image stacks collected using  
381 Leica SP8 confocal microscope (**See Supplemental information**).

382

383 **RT-qPCR analyses.** RNA was extracted using Trizol. After cDNA synthesis (SuperScript™ VILO™  
384 Master-Mix reverse transcriptase, ThermoFisher), Real Time (RT)-PCR was performed (SYBR  
385 Premix Ex TaqII, Takara Bio). Reference genes were *Actin*, *Hprt* and *Tubulin*. Gene expressions were  
386 normalized to the values obtained for E10-YS M $\Phi$ -progenitors, E12 WT Lin<sup>-</sup>Sca<sup>+</sup>cKit<sup>+</sup> (LSK)  
387 progenitors or E12 WT microglia. Primers are listed in **supplemental table 7**.

388

389 **RNA-seq.** M $\Phi$ -progenitors (CD45<sup>+</sup>CD11b<sup>+</sup>Kit<sup>+</sup>) were sorted from E9 (M $\Phi$ <sup>Prim</sup> progenitors) and E10  
390 (M $\Phi$ <sup>Prim</sup> + M $\Phi$ <sup>T-Def</sup> progenitors) YS from WT or *Lyl-1*<sup>LacZ/LacZ</sup> embryos. See **supplemental information**  
391 for sample processing, RNA-sequencing and analysis protocols. RNA-seq. data (accession number  
392 E-MTAB-9618) were deposited in EMBL-EBI ArrayExpress database ([www.ebi.ac.uk/arrayexpress](http://www.ebi.ac.uk/arrayexpress)).  
393 Data were analyzed using Ingenuity® Pathway Analysis (IPA, QIAGEN)<sup>67</sup>, Gene set enrichment  
394 analysis (GSEA)<sup>68, 69</sup>, Morpheus and Venny softwares.

395

396 **Statistical analysis.** Statistical tests were performed using Prism 7 (GraphPad). Statistical  
397 significance is indicated by p-values and/or as \* $p < 0.05$ , \*\* $p < 0.01$ , \*\*\* $p < 0.001$  and \*\*\*\* $p < 0.0001$ .  
398

399 **Acknowledgements.**

400 The authors thank Julien Bertrand for critical reading of the manuscript. We are grateful to the  
401 staff of the facilities at Gustave Roussy, the animal facility (PFEP, UMS AMMICa UMS 3655/US23,  
402 directed by P. Gonin), the imaging facility (PFIC, UMS AMMICa UMS 3655/US23, directed by C.  
403 Laplace-Builhe), the genomic facility directed by N. Droin, the bioinformatics facility (G. Meurice),  
404 directed by M. Deloger.

405 This work was supported by fundings from Institut National de la Santé et de la Recherche  
406 Médicale to W. Vainchenker, I. Plo and H. Raslova, from Centre National de la Recherche  
407 Scientifique and Université de Paris-Saclay to I. Godin, from grants INCA PLBio to I. Plo, “Ligue  
408 Nationale contre le Cancer” Certified Team to H. Raslova, “Association pour la Recherche sur le  
409 Cancer” (n°4878) to I. Godin, Gustave Roussy (TA DERE 17) to D. Ren, Grant Agency of the Czech  
410 Republic (GACR n°19-23154S) to D. Filipp and from fellowships from “Association pour la  
411 Recherche sur le Cancer” to A.-L. Kaushik; “Société Française d’Hématologie” to S. Wang and  
412 Chinese Scholarship Council fellowships to S. Wang and D. Ren.

413

414 **Author Information.**

415 The authors declare no competing financial interests.

416 Correspondence should be addressed to I.G. ([Isabelle.Godin@gustaveroussy.fr](mailto:Isabelle.Godin@gustaveroussy.fr)).

417



418 **REFERENCES**

- 419 1. Pina, C. & Enver, T. Differential contributions of haematopoietic stem cells to foetal and adult  
420 haematopoiesis: insights from functional analysis of transcriptional regulators. *Oncogene* **26**, 6750-6765  
421 (2007).
- 422 2. Wilson, N.K. *et al.* Combinatorial Transcriptional Control In Blood Stem/Progenitor Cells: Genome-wide  
423 Analysis of Ten Major Transcriptional Regulators. *Cell Stem Cell* **7**, 532-544 (2010).
- 424 3. Curtis, D.J., Salmon, J.M. & Pimanda, J.E. Concise Review: Blood Relatives: Formation and regulation of  
425 hematopoietic stem cells by the basic helix-loop-helix transcription factors stem cell leukemia and  
426 lymphoblastic leukemia-derived sequence 1. *Stem Cells* **30**, 1053-1058 (2012).
- 427 4. Porcher, C., Chagraoui, H. & Kristiansen, M.S. SCL/TAL1: a multifaceted regulator from blood development  
428 to disease. *Blood* **129**, 2051-2060 (2017).
- 429 5. Capron, C. *et al.* The SCL relative LYL-1 is required for fetal and adult hematopoietic stem cell function and  
430 B-cell differentiation. *Blood* **107**, 4678-4686 (2006).
- 431 6. McGrath, K.E., Frame, J.M. & Palis, J. Early hematopoiesis and macrophage development. *Seminars in*  
432 *Immunology* **27**, 379-387 (2015).
- 433 7. Palis, J. Hematopoietic stem cell-independent hematopoiesis: emergence of erythroid, megakaryocyte,  
434 and myeloid potential in the mammalian embryo. *FEBS Lett* **590**, 3965-3974 (2016).
- 435 8. Cumano, A. & Godin, I. Ontogeny of the hematopoietic system. *Annu Rev Immunol* **25**, 745-785 (2007).
- 436 9. Kieusseian, A., Brunet de la Grange, P., Burlen-Defranoux, O., Godin, I. & Cumano, A. Immature  
437 hematopoietic stem cells undergo maturation in the fetal liver. *Development* **139**, 3521-3530 (2012).
- 438 10. Palis, J., Robertson, S., Kennedy, M., Wall, C. & Keller, G. Development of erythroid and myeloid  
439 progenitors in the yolk sac and embryo proper of the mouse. *Development* **126**, 5073-5084 (1999).
- 440 11. Bertrand, J.Y. *et al.* Three pathways to mature macrophages in the early mouse yolk sac. *Blood* **106**, 3004-  
441 3011 (2005).
- 442 12. Tober, J. *et al.* The megakaryocyte lineage originates from hemangioblast precursors and is an integral  
443 component both of primitive and of definitive hematopoiesis. *Blood* **109**, 1433-1441 (2007).
- 444 13. Sumner, R., Crawford, A., Mucenski, M. & Frampton, J. Initiation of adult myelopoiesis can occur in the  
445 absence of c-Myb whereas subsequent development is strictly dependent on the transcription factor.  
446 *Oncogene* **19**, 3335-3342 (2000).
- 447 14. Schulz, C. *et al.* A lineage of myeloid cells independent of Myb and hematopoietic stem cells. *Science* **336**,  
448 86-90 (2012).
- 449 15. Hoeffel, G. & Ginhoux, F. Fetal monocytes and the origins of tissue-resident macrophages. *Cell Immunol*  
450 **330**, 5-15 (2018).
- 451 16. Utz, S.G. *et al.* Early Fate Defines Microglia and Non-parenchymal Brain Macrophage Development. *Cell*  
452 **181**, 557-573 e518 (2020).

- 453 17. Ginhoux, F. & Williams, M. Tissue-Resident Macrophage Ontogeny and Homeostasis. *Immunity* **44**, 439-  
454 449 (2016).
- 455 18. Mass, E. Delineating the origins, developmental programs and homeostatic functions of tissue-resident  
456 macrophages. *Int Immunol* **30**, 493-501 (2018).
- 457 19. Ginhoux, F. *et al.* Fate Mapping Analysis Reveals That Adult Microglia Derive from Primitive Macrophages.  
458 *Science* **330**, 841-845 (2010).
- 459 20. Gomez Perdiguero, E. *et al.* Tissue-resident macrophages originate from yolk-sac-derived erythro-myeloid  
460 progenitors. *Nature* **518**, 547-551 (2015).
- 461 21. Kierdorf, K. *et al.* Microglia emerge from erythromyeloid precursors via Pu.1- and Irf8-dependent  
462 pathways. *Nat Neurosci* **16**, 273-280 (2013).
- 463 22. Alliot, F., Godin, I. & Pessac, B. Microglia derive from progenitors, originating from the yolk sac, and which  
464 proliferate in the brain. *Brain Res Dev Brain Res* **117**, 145-152 (1999).
- 465 23. Wu, Y. & Hirschi, K.K. Tissue-Resident Macrophage Development and Function. *Frontiers in Cell and*  
466 *Developmental Biology* **8** (2021).
- 467 24. Herbomel, P., Thisse, B. & Thisse, C. Zebrafish early macrophages colonize cephalic mesenchyme and  
468 developing brain, retina, and epidermis through a M-CSF receptor-dependent invasive process. *Dev Biol*  
469 **238**, 274-288 (2001).
- 470 25. Ferrero, G. *et al.* Embryonic Microglia Derive from Primitive Macrophages and Are Replaced by cmyb-  
471 Dependent Definitive Microglia in Zebrafish. *Cell Reports* **24**, 130-141 (2018).
- 472 26. Wittamer, V. & Bertrand, J.Y. Yolk sac hematopoiesis: does it contribute to the adult hematopoietic  
473 system? *Cell Mol Life Sci* (2020).
- 474 27. Azzoni, E. *et al.* Kit ligand has a critical role in mouse yolk sac and aorta-gonad-mesonephros  
475 hematopoiesis. *EMBO reports* (2018).
- 476 28. Espin-Palazon, R. *et al.* Proinflammatory signaling regulates hematopoietic stem cell emergence. *Cell* **159**,  
477 1070-1085 (2014).
- 478 29. Giroux, S. *et al.* Iyl-1 and tal-1/scl, two genes encoding closely related bHLH transcription factors, display  
479 highly overlapping expression patterns during cardiovascular and hematopoietic ontogeny. *Gene Expr*  
480 *Patterns* **7**, 215-226 (2007).
- 481 30. Cumano, A., Dieterlen-Lievre, F. & Godin, I. Lymphoid potential, probed before circulation in mouse, is  
482 restricted to caudal intraembryonic splanchnopleura. *Cell* **86**, 907-916 (1996).
- 483 31. Cumano, A., Ferraz, J.C., Klaine, M., Di Santo, J.P. & Godin, I. Intraembryonic, but not yolk sac  
484 hematopoietic precursors, isolated before circulation, provide long-term multilineage reconstitution.  
485 *Immunity* **15**, 477-485 (2001).
- 486 32. Hoeffel, G. *et al.* C-Myb+ Erythro-Myeloid Progenitor-Derived Fetal Monocytes Give Rise to Adult Tissue-  
487 Resident Macrophages. *Immunity* **42**, 665-678 (2015).
- 488 33. Mass, E. *et al.* Specification of tissue-resident macrophages during organogenesis. *Science* **353** (2016).

- 489 34. Espin-Palazon, R., Weijts, B., Mulero, V. & Traver, D. Proinflammatory Signals as Fuel for the Fire of  
490 Hematopoietic Stem Cell Emergence. *Trends in Cell Biology* **28**, 58-66 (2018).
- 491 35. Mariani, S.A. *et al.* Pro-inflammatory Aorta-Associated Macrophages Are Involved in Embryonic  
492 Development of Hematopoietic Stem Cells. *Immunity* (2019).
- 493 36. Palpant, N.J. *et al.* Chromatin and Transcriptional Analysis of Mesoderm Progenitor Cells Identifies HOPX  
494 as a Regulator of Primitive Hematopoiesis. *Cell Reports* **20**, 1597-1608 (2017).
- 495 37. Chiu, S.K. *et al.* Shared roles for Scl and Lyl1 in murine platelet production and function. *Blood* **134**, 826-  
496 835 (2019).
- 497 38. McCormack, M.P. *et al.* Requirement for Lyl1 in a model of Lmo2-driven early T-cell precursor ALL. *Blood*  
498 **122**, 2093-2103 (2013).
- 499 39. Epelman, S. *et al.* Embryonic and Adult-Derived Resident Cardiac Macrophages Are Maintained through  
500 Distinct Mechanisms at Steady State and during Inflammation. *Immunity* **40**, 91-104 (2014).
- 501 40. Leid, J. *et al.* Primitive Embryonic Macrophages are Required for Coronary Development and Maturation.  
502 *Circulation Research* **118**, 1498 (2016).
- 503 41. Hagemeyer, N. *et al.* Transcriptome-based profiling of yolk sac-derived macrophages reveals a role for Irf8  
504 in macrophage maturation. *EMBO J* **35**, 1730-1744 (2016).
- 505 42. Ferrier, R. *et al.* Physical interaction of the bHLH LYL1 protein and NF-kappaB1 p105. *Oncogene* **18**, 995-  
506 1005 (1999).
- 507 43. Matcovitch-Natan, O. *et al.* Microglia development follows a stepwise program to regulate brain  
508 homeostasis. *Science* **353**, aad8670 (2016).
- 509 44. Goldmann, T. *et al.* Origin, fate and dynamics of macrophages at central nervous system interfaces. *Nature*  
510 *Immunology* **17**, 797-805 (2016).
- 511 45. Lavin, Y. *et al.* Tissue-Resident Macrophage Enhancer Landscapes Are Shaped by the Local  
512 Microenvironment. *Cell* **159**, 1312-1326 (2014).
- 513 46. Zhang, Y. *et al.* An RNA-sequencing transcriptome and splicing database of glia, neurons, and vascular cells  
514 of the cerebral cortex. *J Neurosci* **34**, 11929-11947 (2014).
- 515 47. Zeisel, A. *et al.* Brain structure. Cell types in the mouse cortex and hippocampus revealed by single-cell  
516 RNA-seq. *Science* **347**, 1138-1142 (2015).
- 517 48. Wehrspau, C.C., Haerty, W. & Ponting, C.P. Microglia recapitulate a hematopoietic master regulator  
518 network in the aging human frontal cortex. *Neurobiol Aging* **36**, 2443 e2449-2443 e2420 (2015).
- 519 49. Bennett, M.L. *et al.* New tools for studying microglia in the mouse and human CNS. *Proceedings of the*  
520 *National Academy of Sciences* **113**, E1738-E1746 (2016).
- 521 50. Zhan, Y. *et al.* Deficient neuron-microglia signaling results in impaired functional brain connectivity and  
522 social behavior. *Nat Neurosci* **17**, 400-406 (2014).
- 523 51. Paolicelli, R.C. *et al.* Synaptic pruning by microglia is necessary for normal brain development. *Science* **333**,  
524 1456-1458 (2011).

- 525 52. Antony, J.M., Paquin, A., Nutt, S.L., Kaplan, D.R. & Miller, F.D. Endogenous microglia regulate development  
526 of embryonic cortical precursor cells. *J Neurosci Res* **89**, 286-298 (2011).
- 527 53. Ueno, M. *et al.* Layer V cortical neurons require microglial support for survival during postnatal  
528 development. *Nat Neurosci* **16**, 543-551 (2013).
- 529 54. Soucie, E.L. *et al.* Lineage-specific enhancers activate self-renewal genes in macrophages and embryonic  
530 stem cells. *Science* **351** (2016).
- 531 55. Crotti, A. & Ransohoff, R.M. Microglial Physiology and Pathophysiology: Insights from Genome-wide  
532 Transcriptional Profiling. *Immunity* **44**, 505-515 (2016).
- 533 56. Bisht, K., Sharma, K. & Tremblay, M.-È. Chronic stress as a risk factor for Alzheimer's disease: Roles of  
534 microglia-mediated synaptic remodeling, inflammation, and oxidative stress. *Neurobiology of Stress* **9**, 9-  
535 21 (2018).
- 536 57. Friedman, B.A. *et al.* Diverse Brain Myeloid Expression Profiles Reveal Distinct Microglial Activation States  
537 and Aspects of Alzheimer's Disease Not Evident in Mouse Models. *Cell Reports* **22**, 832-847 (2018).
- 538 58. Colangelo, V. *et al.* Gene expression profiling of 12633 genes in Alzheimer hippocampal CA1: transcription  
539 and neurotrophic factor down-regulation and up-regulation of apoptotic and pro-inflammatory signaling.  
540 *J Neurosci Res* **70**, 462-473 (2002).
- 541 59. Thomas, D.M., Francescutti-Verbeem, D.M. & Kuhn, D.M. Gene expression profile of activated microglia  
542 under conditions associated with dopamine neuronal damage. *Faseb J* **20**, 515-517 (2006).
- 543 60. Nimmakayalu, M. *et al.* Apparent germline mosaicism for a novel 19p13.13 deletion disrupting NFIX and  
544 CACNA1A. *Am J Med Genet A* **161A**, 1105-1109 (2013).
- 545 61. Pirot, N. *et al.* LYL1 activity is required for the maturation of newly formed blood vessels in adulthood.  
546 *Blood* **115**, 5270-5279 (2010).
- 547 62. Jung, S. *et al.* Analysis of fractalkine receptor CX(3)CR1 function by targeted deletion and green  
548 fluorescent protein reporter gene insertion. *Mol Cell Biol* **20**, 4106-4114 (2000).
- 549 63. Bertrand, J.Y., Giroux, S., Cumano, A. & Godin, I. Hematopoietic stem cell development during mouse  
550 embryogenesis. *Methods Mol Med* **105**, 273-288 (2005).
- 551 64. Mildner, A. *et al.* Microglia in the adult brain arise from Ly-6ChiCCR2+ monocytes only under defined host  
552 conditions. *Nat Neurosci* **10**, 1544-1553 (2007).
- 553 65. Fiering, S.N. *et al.* Improved FACS-Gal: flow cytometric analysis and sorting of viable eukaryotic cells  
554 expressing reporter gene constructs. *Cytometry* **12**, 291-301 (1991).
- 555 66. Guo, W. & Wu, H. Detection of LacZ expression by FACS-Gal analysis. *Nature Protocol Exchange* (2008).
- 556 67. Krämer, A., Green, J., Pollard, J., Jr. & Tugendreich, S. Causal analysis approaches in Ingenuity Pathway  
557 Analysis. *Bioinformatics* **30**, 523-530 (2014).
- 558 68. Mootha, V.K. *et al.* PGC-1alpha-responsive genes involved in oxidative phosphorylation are coordinately  
559 downregulated in human diabetes. *Nat Genet* **34**, 267-273 (2003).

560 69.Subramanian, A. *et al.* Gene set enrichment analysis: a knowledge-based approach for interpreting  
561 genome-wide expression profiles. *Proc Natl Acad Sci U S A* **102**, 15545-15550 (2005).  
562  
563  
564

565 **FIGURE LEGENDS**

566

567 **Figure 1: *Lyl-1* expression marks  $M\Phi^{Prim}$  progenitors in the early YS**

568 **A. *Lyl-1*-deficiency leads to an increased production of  $M\Phi$ -progenitors in the early YS:** Left: Clonogenic  
569 potential of E8 OrgD1-YS cells: production of  $M\Phi$ -progenitors (CFU-M) in WT and *Lyl-1*<sup>LacZ/LacZ</sup> OrgD1-YS  
570 (n=3-5, 3-6 YS per sample; mean  $\pm$  s.e.m.; Unpaired, two-tailed *t*-Test). The size of the  $M\Phi$  colonies and the  
571 cell morphology were similar for the 3 genotypes (data not shown). Right: distribution of other progenitors  
572 with a myeloid potential (EMP and GM) in WT, *Lyl-1*<sup>WT/LacZ</sup> and *Lyl-1*<sup>LacZ/LacZ</sup> E8 OrgD1-YS.

573 **B. *Lyl-1* expression in  $M\Phi$ -progenitors:** FACS-Gal assay, using the  $\beta$ -Gal fluorescent substrate FDG was used  
574 as a reporter for *Lyl-1* expression. While all  $M\Phi$ -progenitors in E9-YS (left panel) expressed FDG/*Lyl-1*, E9.5  
575 and E10-YS (middle panels) harbored two  $M\Phi$ -progenitor subsets discriminated by their FDG/*Lyl-1*  
576 expression. FDG<sup>+</sup>/*Lyl-1*<sup>+</sup> and FDG<sup>-</sup>/*Lyl-1*<sup>-</sup> mature  $M\Phi$ s (CD11b<sup>+</sup>F4/80<sup>+</sup>) also coexisted in E10-YS (right). The  
577 contour plots in WT samples indicate the level of non-specific background  $\beta$ -Gal activity/FDG labeling in WT  
578 samples. Representative profiles of 3 independent samples, each consisting of 3-4 YS (See the gating  
579 strategy in **Supplemental figure 1A**).

580 **C.  $M\Phi^{Prim}$  progenitors express *Lyl-1*.** Upper panel: Flow cytometry profiles of WT (left) and *Lyl-1*<sup>WT/LacZ</sup>  
581 (middle left) E8-YS (0-3S). CD11b<sup>+</sup>CD31<sup>-</sup>  $M\Phi$ s (top gate) correspond to maternal  $M\Phi$ s present in E8-YS.<sup>11</sup> All  
582 CD11b<sup>+</sup>CD31<sup>+</sup>  $M\Phi$ -progenitors (lower gate) displayed FDG/*Lyl-1* expression.

583 **D. RT-qPCR quantification of *Myb* expression levels:** Kit<sup>+</sup>CD45<sup>+</sup>CD11b<sup>+</sup> progenitors were sorted from WT  
584 E9-YS, WT and *Lyl-1*<sup>WT/LacZ</sup> E10-YS, and from FDG/*Lyl-1* positive and negative fractions of  $M\Phi$ -progenitors  
585 from *Lyl-1*<sup>WT/LacZ</sup> E10-YS. Lin<sup>-</sup>Sca<sup>+</sup>Kit<sup>+</sup> (LSK) progenitors from WT E12-FL were used as positive control.  
586 FDG<sup>+</sup>/*Lyl-1*<sup>+</sup>  $M\Phi$ -progenitors from E10-YS expressed *Myb*<sup>Low/Neg</sup> levels similar to  $M\Phi^{Prim}$  progenitors from E9-  
587 YS. The FDG<sup>-</sup>/*Lyl-1*<sup>-</sup> fraction expressed significantly higher *Myb* levels, similar to LSK cells from E12-FL. *Myb*  
588 expression levels, shown on a Log<sup>2</sup> scale, were normalized to the mean expression value obtained for WT  
589 E10-YS, considered as 1 (Unpaired, two-tailed *t*-Test).

590 **E. FDG/*Lyl-1* positive and negative myeloid progenitors produce a distinct progeny:** Clonogenic assays  
591 characterization of the type of progenitors produced by myeloid progenitors (Ter119<sup>+</sup>Kit<sup>+</sup>CD45<sup>+</sup>CD11b<sup>+</sup>)  
592 sorted from WT and *Lyl-1*<sup>WT/LacZ</sup> E9-YS (<18 S; n=7) and E10-YS (n=15) in 3 independent experiments. At E10,  
593 myeloid progenitors from *Lyl-1*<sup>WT/LacZ</sup> YS were subdivided into FDG/*Lyl-1* negative (n=15) and positive (n=12)  
594 fractions (5 independent experiments). Samples were biological replicates comprising 6-8 YS. 100 to 150  
595 Kit<sup>+</sup>CD45<sup>+</sup>CD11b<sup>+</sup> cells per condition were plated in triplicate. All samples produced few non-myeloid  
596 contaminants, such as EMk and EMP in similar, non-significant amounts. FDG<sup>+</sup>/*Lyl-1*<sup>+</sup> progenitors essentially  
597 produced  $M\Phi$  colonies, while FDG<sup>-</sup>/*Lyl-1*<sup>-</sup> progenitors produced also GM and G colonies.

598

599

600 **Figure 2: Distinct features of WT M $\Phi$ -progenitors at E9 and E10**

601 **A.** Differentially expressed genes in M $\Phi$ -progenitors (Kit<sup>+</sup>CD45<sup>+</sup>CD11b<sup>+</sup>) sorted from WT and *Lyl-1*<sup>LacZ/LacZ</sup>YS  
602 at E9 and E10. Upper panel: Unsupervised principal component analysis (PCA) plot positioned E9 and E10  
603 M $\Phi$ -progenitors in two distinct groups, followed by segregation of WT and *Lyl-1*<sup>LacZ/LacZ</sup> samples. Lower  
604 panel: Volcano plot of E9 WT vs E10 WT M $\Phi$ -progenitors. Red and green dots indicate genes with  
605 statistically significant changes in expression level. (*p*-value <0.05, absolute fold change $\geq$ 2.0) (NDE: not  
606 deregulated genes; DE-Up: up-regulated genes; DE-Down: down-regulated genes).

607 **B.** Upper panel: Venn diagram comparing DEGs in E9 WT versus E10 WT M $\Phi$ -progenitors to the EMP (Left)  
608 or M $\Phi$  signatures defined by Mass et al.<sup>33</sup> (GEO accession number GSE81774). The number and percentage  
609 of DEGs common to the EMP or M $\Phi$  signatures is shown.

610 Lower panel: Expression profiles of the overlapping genes identified in the Venn diagram (Heatmap displays  
611 transformed log<sub>2</sub>-expression values; Unpaired *t*-Test, two-tailed). Note the higher expression at E10 of  
612 genes involved in erythroid (Globins: Pink arrow; Transcription factors: green arrow), and megakaryocytic  
613 and granulocytic-related genes (blue arrow), and of *Mrc1*/CD206 (Asterisk).

614 **C.** Relative expression levels of *Gata1* and *Spi1*/PU.1, indicated by their relative Transcripts per million kilo-  
615 bases (TPM).

616 **D.** Enriched Pathways in E9 and E10 WT M $\Phi$ -progenitors with absolute z-score  $\geq$ 2, from QIAGEN's  
617 Ingenuity<sup>®</sup> Pathway Analysis (IPA). Bars: minus log of the p-value of each canonical pathway; Orange line:  
618 threshold p-value of 0.05. Ratio: genes detected/genes per pathway.

619 **E.** Expression profiles of DEGs related to IFN $\gamma$  and IFN $\beta$  response, identified by g:Profiler. (Heatmap displays  
620 transformed log<sub>2</sub>-expression values; unpaired *t*-Test, two-tailed).

621 **F.** Expression profiles of DEGs related to MHC-II complex (Heatmap displays transformed log<sub>2</sub>-expression  
622 values; unpaired *t*-Test, two-tailed).

623 **G.** Expression profiles of DEGs related to cytokine signaling (Heatmap displays transformed log<sub>2</sub>-expression  
624 values; unpaired *t*-Test, two-tailed).

625

626 **Figure 3: *Lyl-1* regulates the production of E8 M $\Phi$ <sup>Prim</sup> progenitors.**

627 **A.** In clonogenic assays, the number of M $\Phi$  colonies obtained from E8-YS (0-3S) was increased in *Lyl-1*<sup>WT/LacZ</sup>  
628 and *Lyl-1*<sup>LacZ/LacZ</sup> compared to WT. The majority of the 25-30 colonies per YS were Ery<sup>P</sup> (60 to 80% in each 3  
629 genotypes). Other progenitors were occasionally and randomly detected in WT and mutant samples (less  
630 than one EMP (0.81% $\pm$ 0.66; n=3) and/or GM progenitor per E8-YS), confirming that the assay was  
631 performed at a time when M $\Phi$ <sup>T-Def</sup> progenitors were absent. (n=3-5, 5-10 YS per sample; plots show mean  
632  $\pm$  s.e.m.; Unpaired, two-tailed *t*-Test).

633 **B.** Relative expression levels of the CD41 coding gene *Itg2b* in WT and *Lyl-1*<sup>LacZ/LacZ</sup> M $\Phi$ -progenitors at E9  
634 (unpaired *t*-Test, two-tailed).



635 C. Relative expression levels of TF regulating hematopoietic progenitor emergence in  $Lyl-1^{LacZ/LacZ}$  MΦ-  
636 progenitors compared to WT at E9 (unpaired, two-tailed *t*-Test).  
637 D. GSEA pathways (Top; FDR q-Value <0.29) and GO terms (Bottom; FDR q-value <0.01) enriched in E9  $Lyl-1^{LacZ/LacZ}$   
638 compared to E9 WT MΦ-progenitors. Highlighted are the pathways specifically related to embryo  
639 patterning (blue) and to the development of skeletal (green) and nervous systems (yellow). Pink arrows  
640 point to changes related to metabolic pathways.

641  
642 **Figure 4: Defective differentiation of  $Lyl-1^{LacZ/LacZ}$  MΦ-progenitors from E10-YS.**

643 A. Distribution of A1-A2 and A3 MΦ subsets in E10-YS from  $Cx3cr1^{WT/GFP}:Lyl-1^{WT/WT}$ ,  $Cx3cr1^{WT/GFP}:Lyl-1^{WT/LacZ}$   
644 and  $Cx3cr1^{WT/GFP}:Lyl-1^{LacZ/LacZ}$  embryos. While the size of the whole MΦ population is similar in the three  
645 genotypes (Top panel),  $Lyl-1$  deficiency leads to a modified distribution of the MΦ subsets (middle and  
646 lower panel) with an increased size of the A1 subset and a reduced A3 pool (5-12 independent analyses, 6-  
647 8 YS per sample. Plots show mean ± s.e.m.; Unpaired, two-tailed *t*-Test).

648 B. GSEA pathway indicates a deficit in Jak1-Stat signaling in  $Lyl-1^{LacZ/LacZ}$  MΦ-progenitors compared to WT  
649 at E9 (NES: normalized enrichment score; FDR: false discovery rate).

650 C. Relative expression levels (read counts) of hematopoietic markers in WT and  $Lyl-1^{LacZ/LacZ}$  MΦ-  
651 progenitors at E9 (unpaired *t*-Test, two-tailed).

652 D. Top 1 GSEA pathway indicates that the IFN signaling pathway (left) which characterize E9 MΦ<sup>Prim</sup>  
653 progenitors, and particularly *Irf8* (right), is defective in  $Lyl-1^{LacZ/LacZ}$  MΦ-progenitors (NES: normalized  
654 enrichment score; FDR: false discovery rate).

655 E. From the 53 canonical pathways identified by IPA in the DEGs, 9 were enriched with an absolute Z score  
656 ≥ 1. Bars: minus log of the *p*-value of each canonical pathway; Orange line: threshold *p*-value of 0.05. Ratio:  
657 genes detected/genes per pathway.

658 F. Upper panel: Venn diagram comparing the DEGs in E9  $Lyl-1^{LacZ/LacZ}$  vs E9 WT to those in E10  $Lyl-1^{LacZ/LacZ}$  vs  
659 E10 WT MΦ-progenitors. Lower panel: Expression profiles of the DEGs common to both stages identified  
660 by the Venn comparison (Heatmap displays transformed log<sub>2</sub>-expression values; unpaired *t*-Test, two-  
661 tailed).

662  
663 **Figure 5: Contribution of  $Lyl-1$ -expressing MΦ-progenitors to the fetal liver and brain.**

664 A. Left panel: All MΦ-progenitors from E10-Brain (Left) expressed  $Lyl-1$ , contrary to the corresponding YS  
665 (Figure 1B right) which harbor both FDG<sup>+</sup>/ $Lyl-1$ <sup>+</sup> and FDG<sup>-</sup>/ $Lyl-1$ <sup>-</sup> subsets. MΦ-progenitors from E10  $Lyl-1^{LacZ/LacZ}$   
666 FL (right) harbored both FDG<sup>+</sup>/ $Lyl-1$ <sup>+</sup> and FDG<sup>-</sup>/ $Lyl-1$  MΦ-progenitor subsets. Right panel: in E10-  
667 brain, mature MΦs (CD11b<sup>+</sup>F4/80<sup>+</sup> gate) were all FDG<sup>+</sup>/ $Lyl-1$ <sup>+</sup>. The contour plots in WT samples (Top panel)  
668 indicate the level of non-specific background β-Gal activity/FDG labeling in WT samples. Representative  
669 profiles of 3 independent samples, each consisting of 3-4 E10-Brain or 8-12 E10-FL.



670 **B.** Quantification of cKit<sup>+</sup>CD45<sup>+</sup>CD11b<sup>+</sup> MΦ-progenitors in E10-FL (plots show mean ± s.e.m.; Unpaired, two-  
671 tailed *t*-Test).

672 **C. *Lyl-1* marks the entire F4/80+ microglia/BAM population from the onset of brain colonization.** FDG/*Lyl-*  
673 1 expression in F4/80+ microglia/BAM from the brain of *Lyl-1*<sup>WT/LacZ</sup> and *Lyl-1*<sup>LacZ/LacZ</sup> embryos at E9 to E11.  
674 The rare CD11b<sup>+</sup> F4/80<sup>low-neg</sup> cells present in the brain at E9 are FDG<sup>+</sup>/*Lyl-1*<sup>+</sup> (Top Panel). Grey histograms  
675 indicate non-specific background β-Gal activity/FDG levels in WT samples.

676 **D. MΦ-progenitors from E10-brain express *Myb* levels similar to E9-YS MΦ<sup>Prim</sup> progenitors.** RT-qPCR  
677 quantification of *Myb* expression levels in Kit<sup>+</sup>CD45<sup>+</sup>CD11b<sup>+</sup> MΦ-progenitors sorted from WT E9-YS and  
678 from WT and *Lyl-1*<sup>WT/LacZ</sup> brain at E10. Lin<sup>-</sup>Sca<sup>+</sup>cKit<sup>+</sup> (LSK) progenitors from WT E12-FL were used as positive  
679 control. *Myb* expression levels, shown on a Log<sup>2</sup> scale, were normalized to the mean expression value  
680 obtained for WT E10-YS, considered as 1 (Unpaired, two-tailed *t*-Test).

681 **E.** Heatmap expression profile of the genes that mark the development of tissue resident-MΦs in WT E9  
682 and E10 MΦ-progenitors (Heatmap displays transformed log2-expression values; Unpaired, two-tailed *t*-  
683 Test).

684 **F.** RT-qPCR analyses of *Lyl-1* expression in A1 to A3 MΦ subsets isolated from *Cx3cr1*<sup>WT/GFP</sup> brain at E10. *Lyl-*  
685 1 is expressed by the 3 subsets, with levels decreasing with differentiation. Expression levels were  
686 normalized to the mean value obtained for *Cx3cr1*<sup>WT/GFP</sup> YS A1 progenitors (n=3).

687 **G. Defective differentiation of brain MΦ-progenitor in *Lyl-1* mutant embryos.** Distribution of A1-A2 and  
688 A3 MΦ subsets in E10 brain from *Cx3cr1*<sup>WT/GFP</sup>:*Lyl-1*<sup>WT/WT</sup>, *Cx3cr1*<sup>WT/GFP</sup>:*Lyl-1*<sup>WT/LacZ</sup> and *Cx3cr1*<sup>WT/GFP</sup>:*Lyl-*  
689 1<sup>LacZ/LacZ</sup> embryos. The size of the whole MΦ population was similar in the three genotypes (Top panel), but  
690 *Lyl-1* deficiency modified the distribution of the MΦ subsets (middle and lower panel) with an increased  
691 size of the A1 subset and a reduced A3 pool (5-12 independent analyses, 6-8 brains per sample. Plots show  
692 mean ± s.e.m.; Unpaired, two-tailed *t* Test).

693

694 **Figure 6: *Lyl-1* deficiency leads to transient reductions of the microglia pool at E12 and P0-P3.**

695 **A.** Quantification of the microglia population in E12 and E14 brain showing the decreased size of the  
696 microglia pool at E12 and its recovery to a normal pool size at E14. Plots show mean ± s.e.m.; Two tailed,  
697 unpaired *t*-test.

698 **B.** The decreased microglia pool at E12 may result from a reduced proliferation, as shown by the two folds  
699 decrease (right) of BrdU-labeled cells in *Lyl-1*<sup>LacZ/LacZ</sup> (middle) compared to WT (left) brains. Plots show  
700 mean±s.e.m.; Two tailed, unpaired *t*-test.

701 **C.** At E12, *Cx3cr1*<sup>WT/GFP</sup>:*Lyl-1*<sup>LacZ/LacZ</sup> microglia displayed a reduced number and extent of ramifications  
702 compared to their *Cx3cr1*<sup>WT/GFP</sup> counterpart. Bottom: Microglia morphology was classified into subtypes  
703 depending on the number of main ramifications (A: none, B: 2, C: 3 and D:>3). Top: Microglia deprived of  
704 ramifications predominated in *Lyl-1*-deficient microglia. 65 and 61 cells were respectively acquired from

705 the midbrain of E12 *Cx3cr1*<sup>WT/GFP</sup> and *Cx3cr1*<sup>WT/GFP</sup>:*Lyl-1*<sup>LacZ/LacZ</sup> embryos (for each genotype, brains from 12  
706 embryos were acquired in 3 independent experiments). Microglia were identified by *Cx3cr1*-driven GFP  
707 expression and F4/80-APC immuno-staining. Bar=10µm. Plots show mean±s.e.m.; Two tailed, unpaired *t*-  
708 test.

709 **D.** In *Lyl-1*<sup>LacZ/LacZ</sup> newborns, the cellularity of the brain was consistently lower than in WT (left), and so was  
710 the estimated microglia number (right). Plots show mean ± s.e.m.; Two tailed, unpaired *t*-test.

711 **E.** Kinetic evolution of *Lyl-1* expression levels in WT microglia from embryonic stages to adulthood. An  
712 increased expression of *Lyl-1* from embryonic stages to adulthood was also inferred from timeline RNA-seq.  
713 data.<sup>43</sup> (GEO accession number GSE79812).

714 **F.** Quantitative RT-PCR analyses also point to E12 and P0 as key development stages regulated by *Lyl-1*.  
715 CD11b<sup>+</sup>F4/80<sup>+</sup>CD45<sup>low</sup> microglia were isolated at sequential development stages. Bar graphs show the  
716 kinetic of expression of genes modified in *Lyl-1*<sup>LacZ/LacZ</sup> microglia (arrowheads), normalized to the mean  
717 expression value in WT E12 microglia (n=3). Error bars indicate s.e.m. Two tailed, unpaired *t*-test.

718 **G.** *Cx3Cr1* and *Lyl-1* expression in mutant microglia. The expression level of *Cx3CR1*, analyzed as in F, was  
719 decreased in *Lyl-1* mutants at E12 (left), while *Lyl-1* expression levels were unmodified in *CX3CR1*<sup>GFP/GFP</sup>  
720 microglia at E12 and in newborns (right).

721 **H.** *Mafb* expression in mutant microglia. *Mafb* expression level, analyzed as in F, was reduced in the  
722 microglia of *Lyl-1*<sup>LacZ/LacZ</sup> newborns.

723 **I.** The expression of genes enriched in microglia and/or essential for their function are deregulated in *Lyl*-  
724 *1*<sup>LacZ/LacZ</sup> MΦ-progenitors at E9. Relative expression levels (read counts) in WT and *Lyl-1*<sup>lacZ/lacZ</sup> MΦ-  
725 progenitors from E9-YS (Unpaired, two-tailed *t*-Test).

726

727

Figure 1

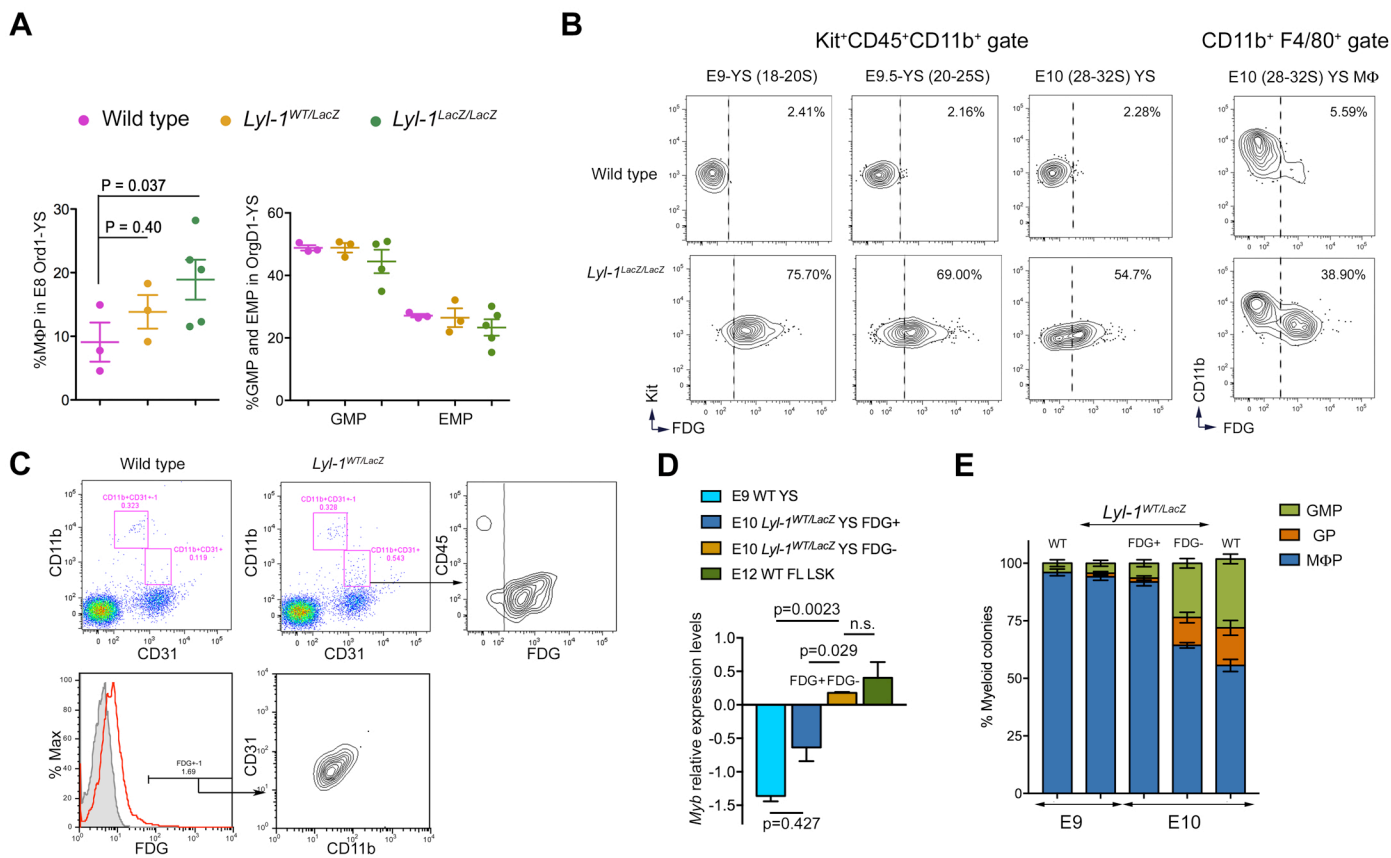

Figure 2

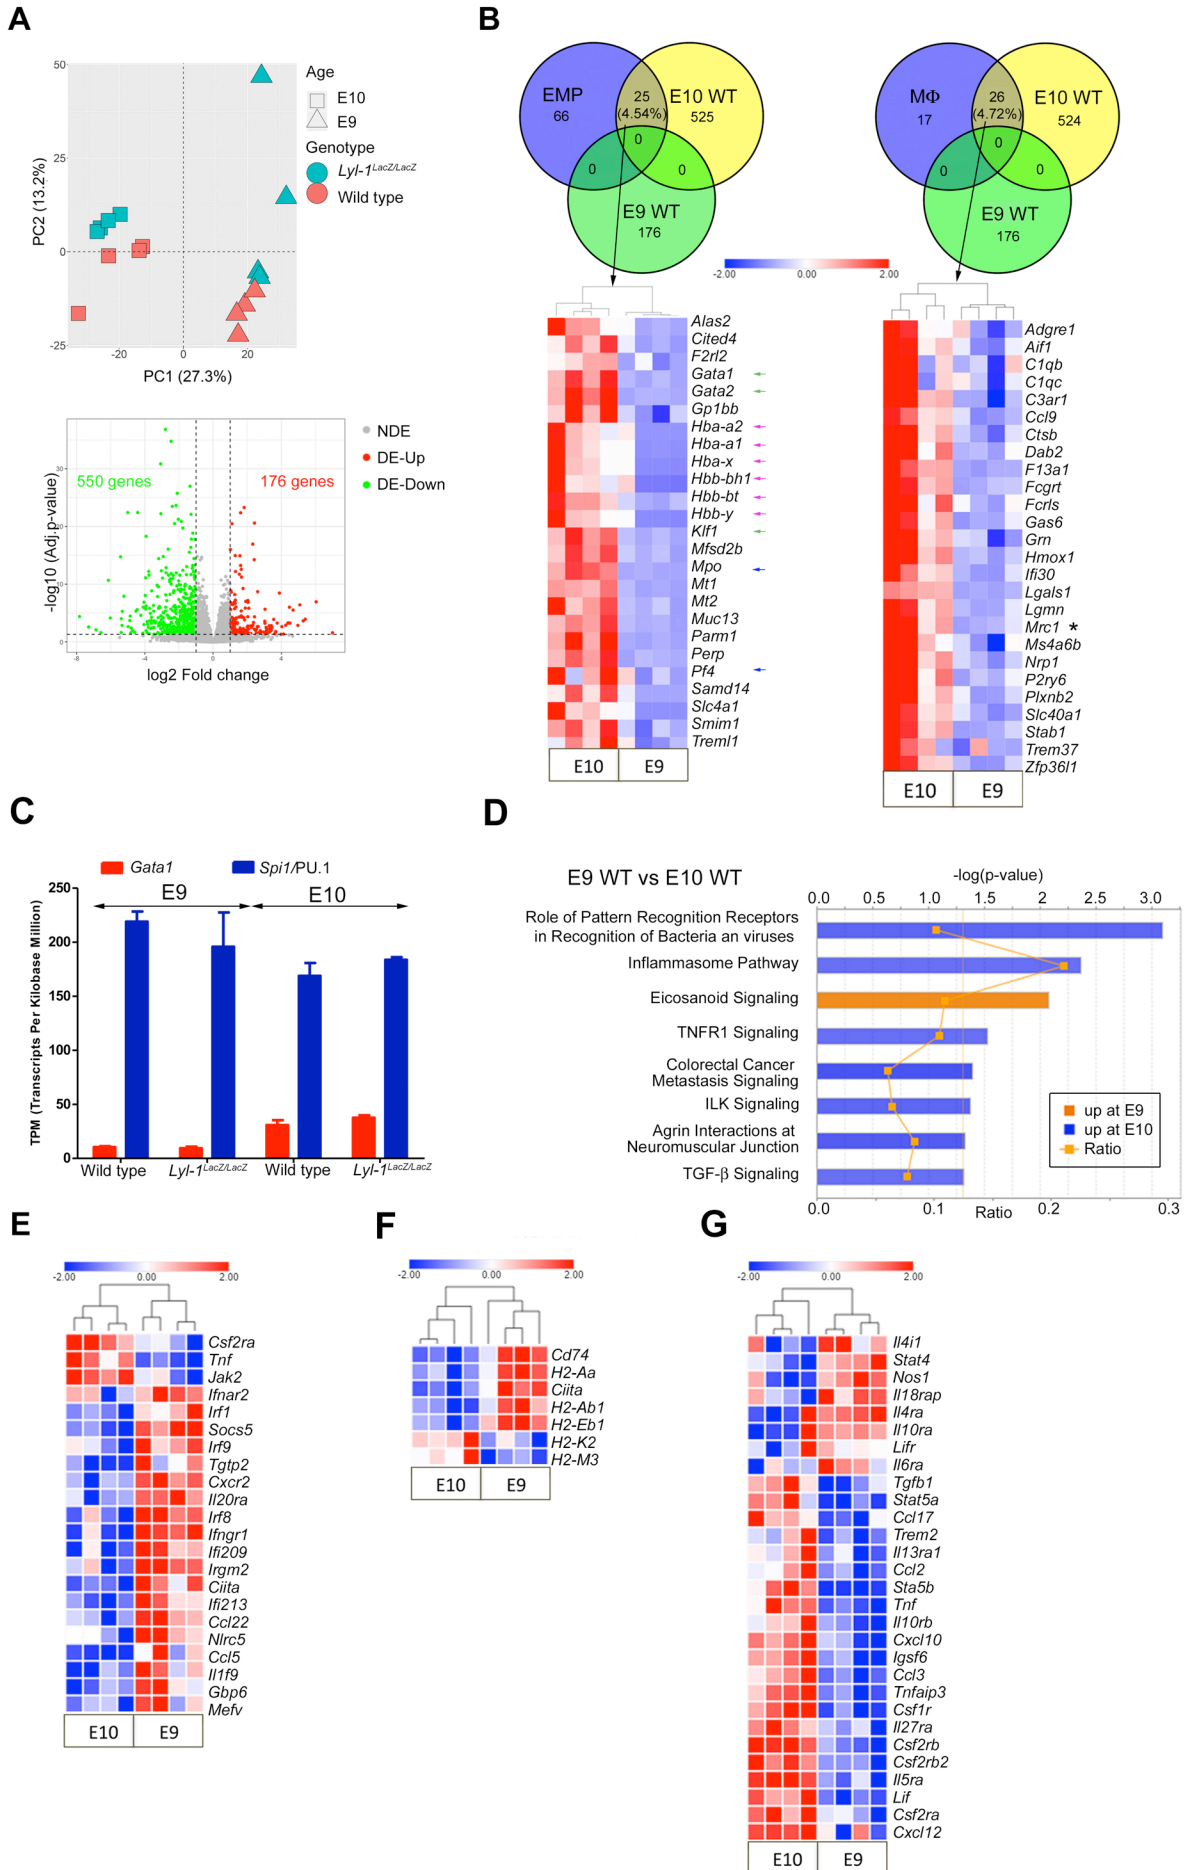

Figure 3

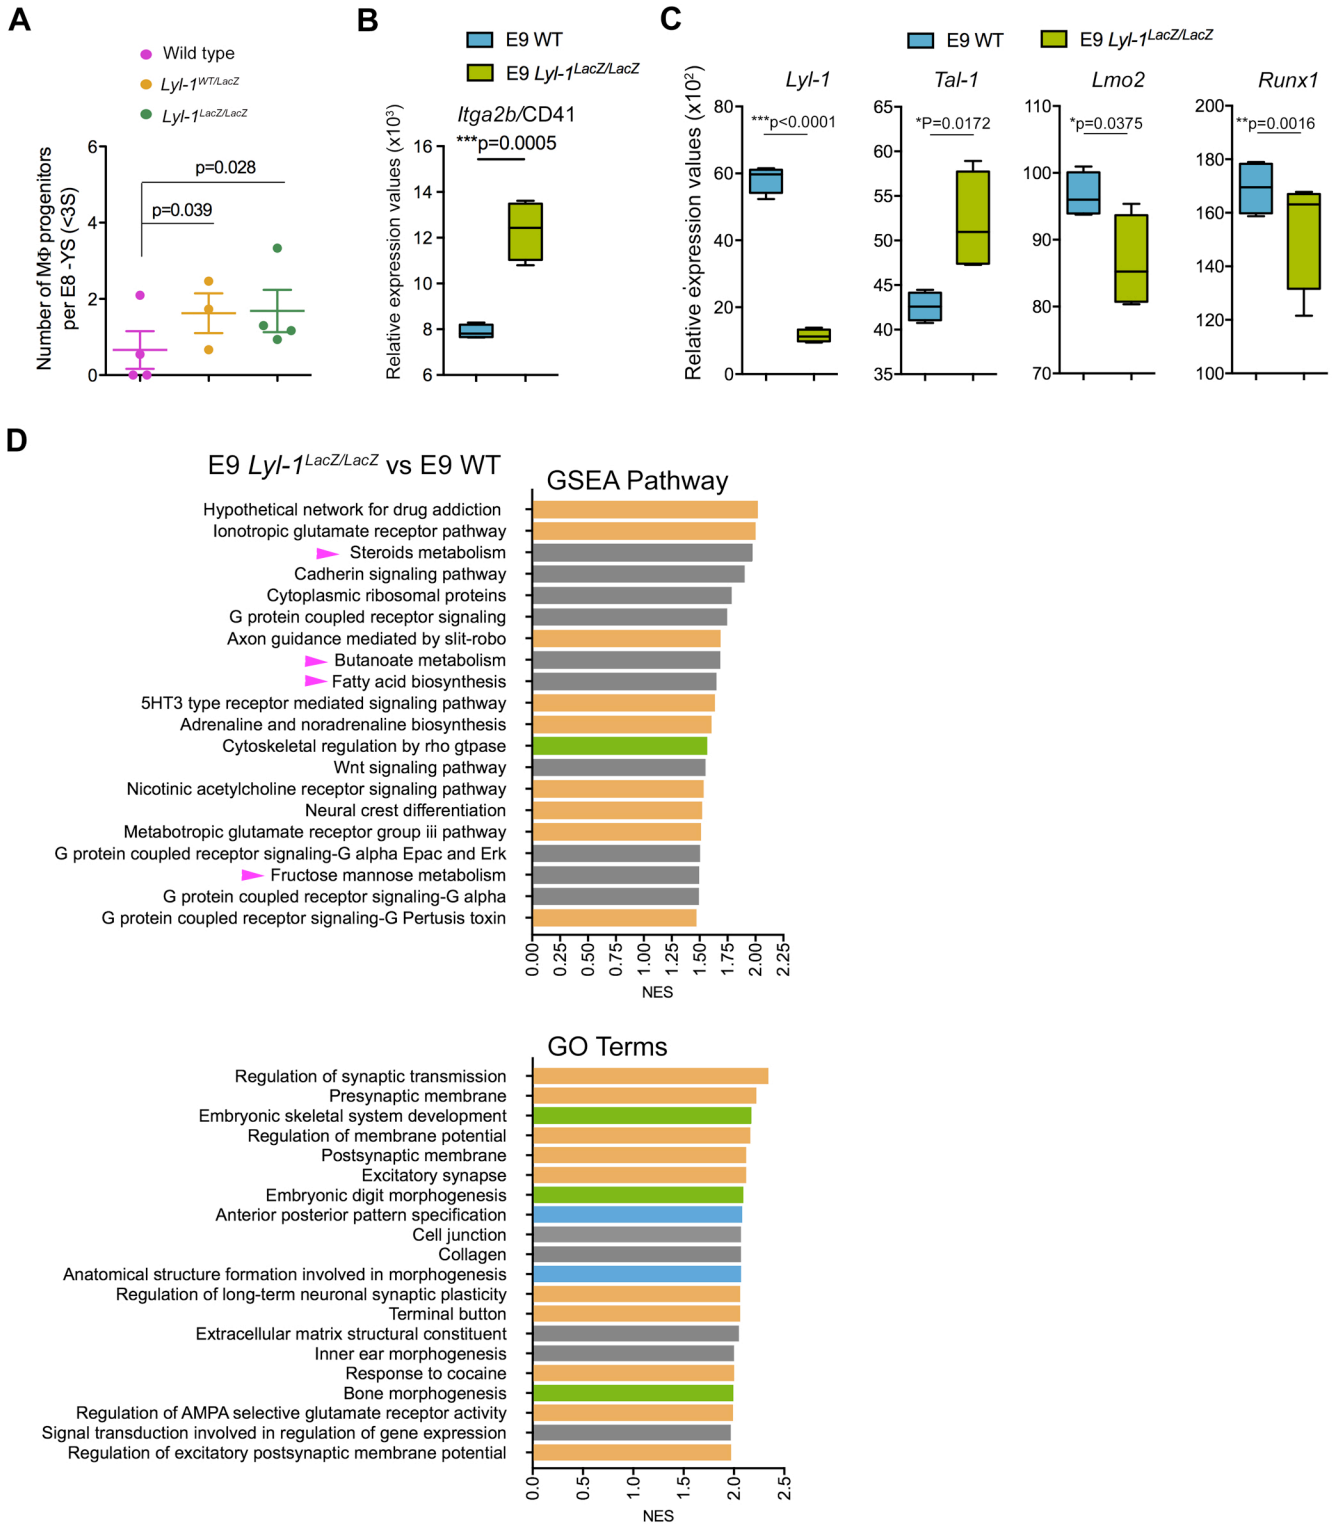

Figure 4

A

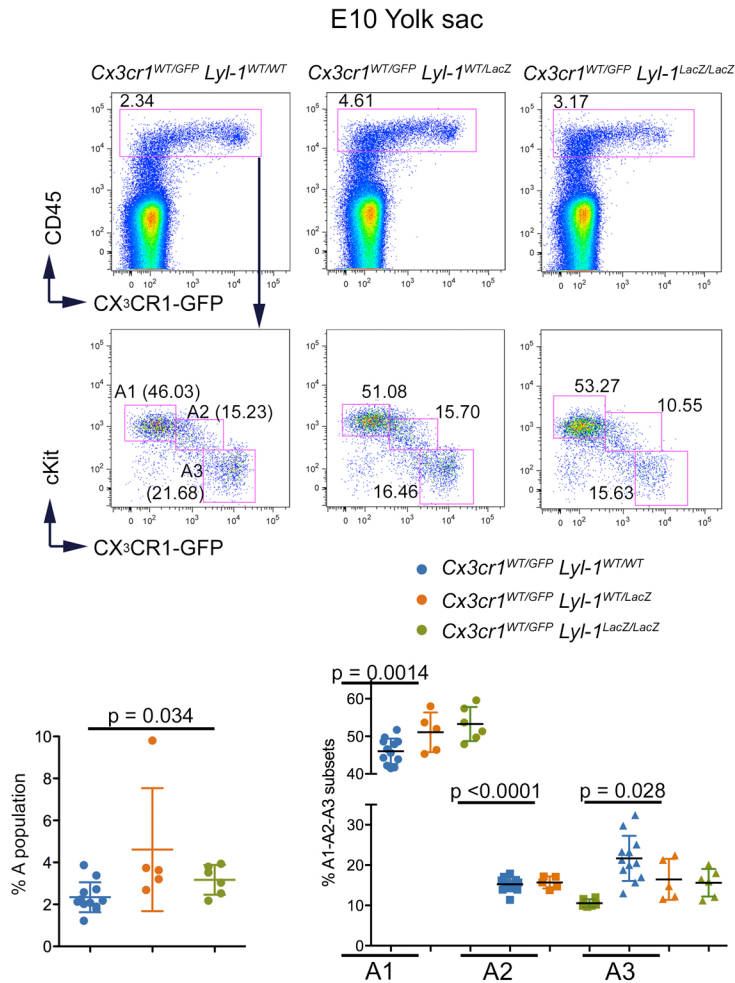

B

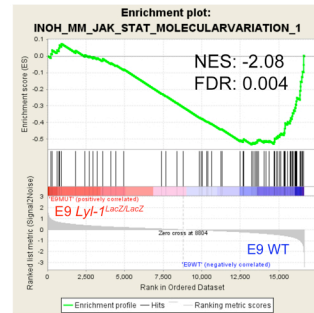

C

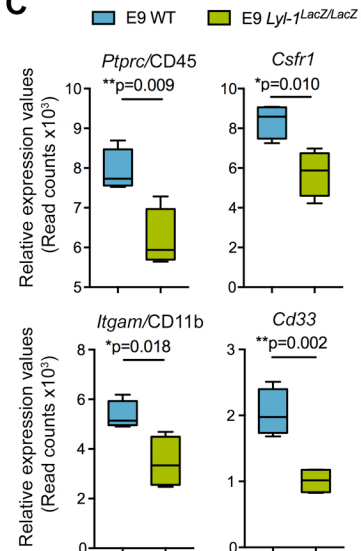

D

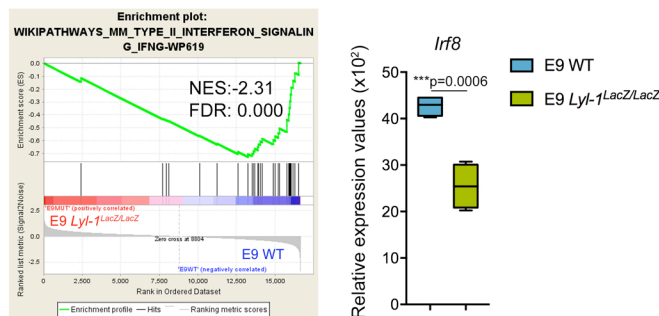

E

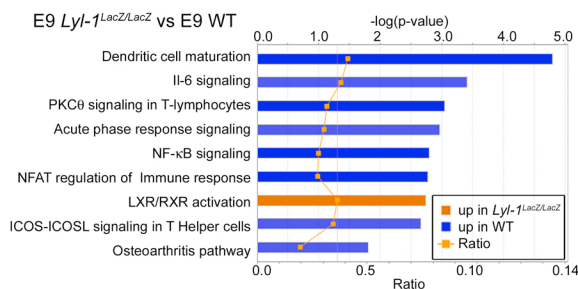

F

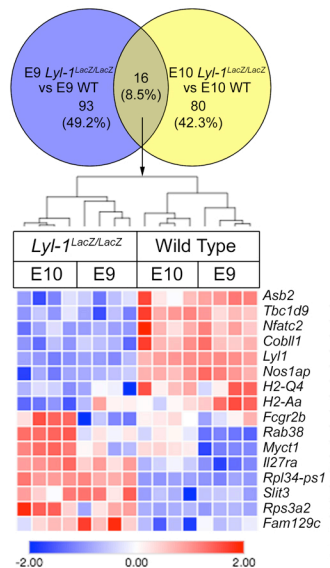



Figure 5

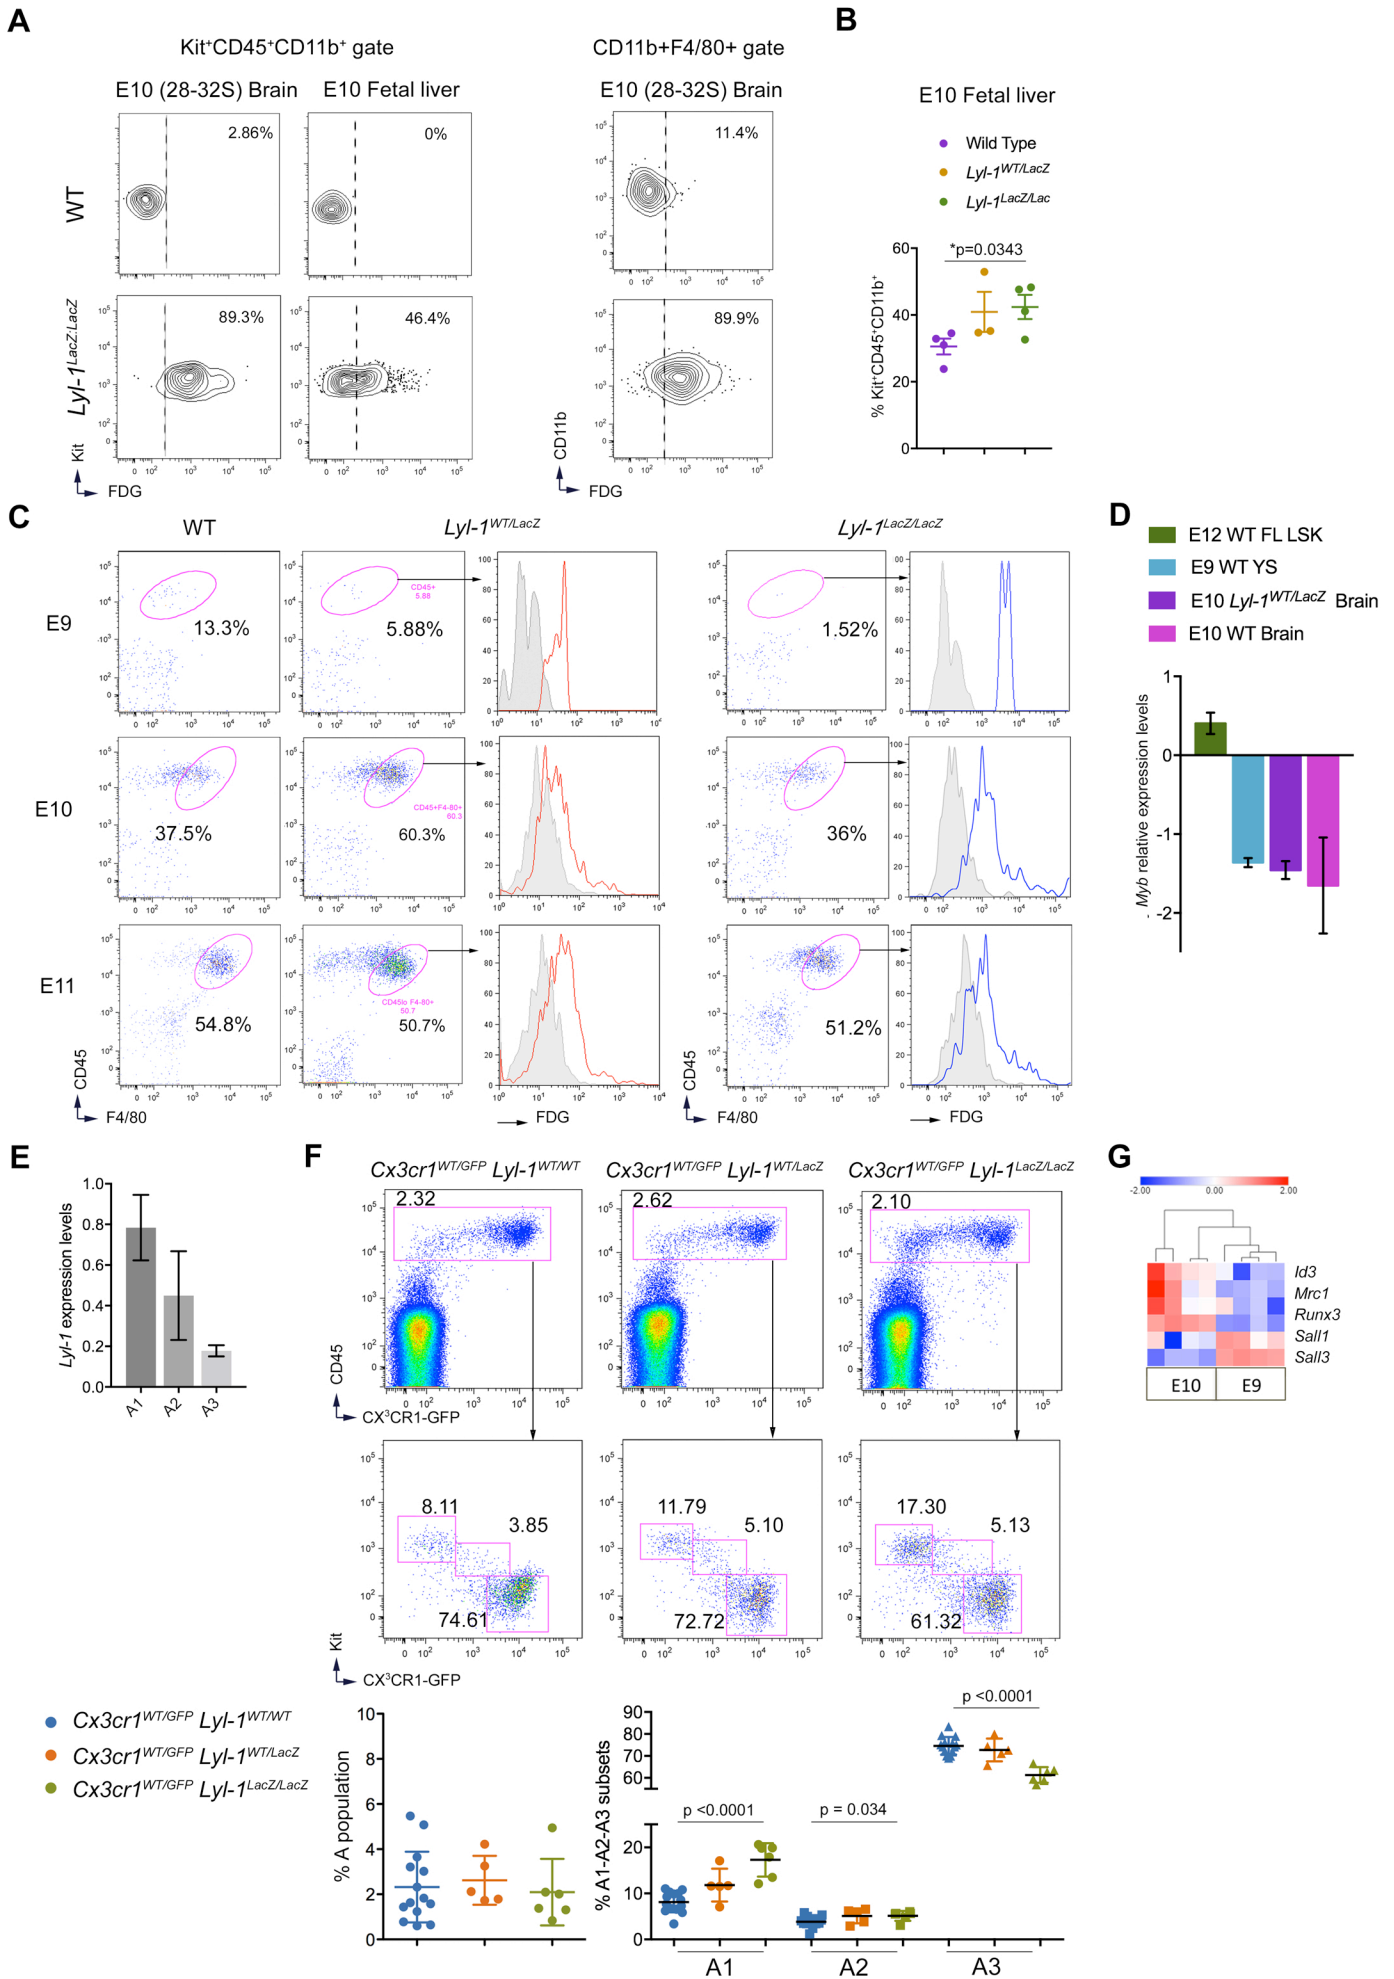

Figure 6

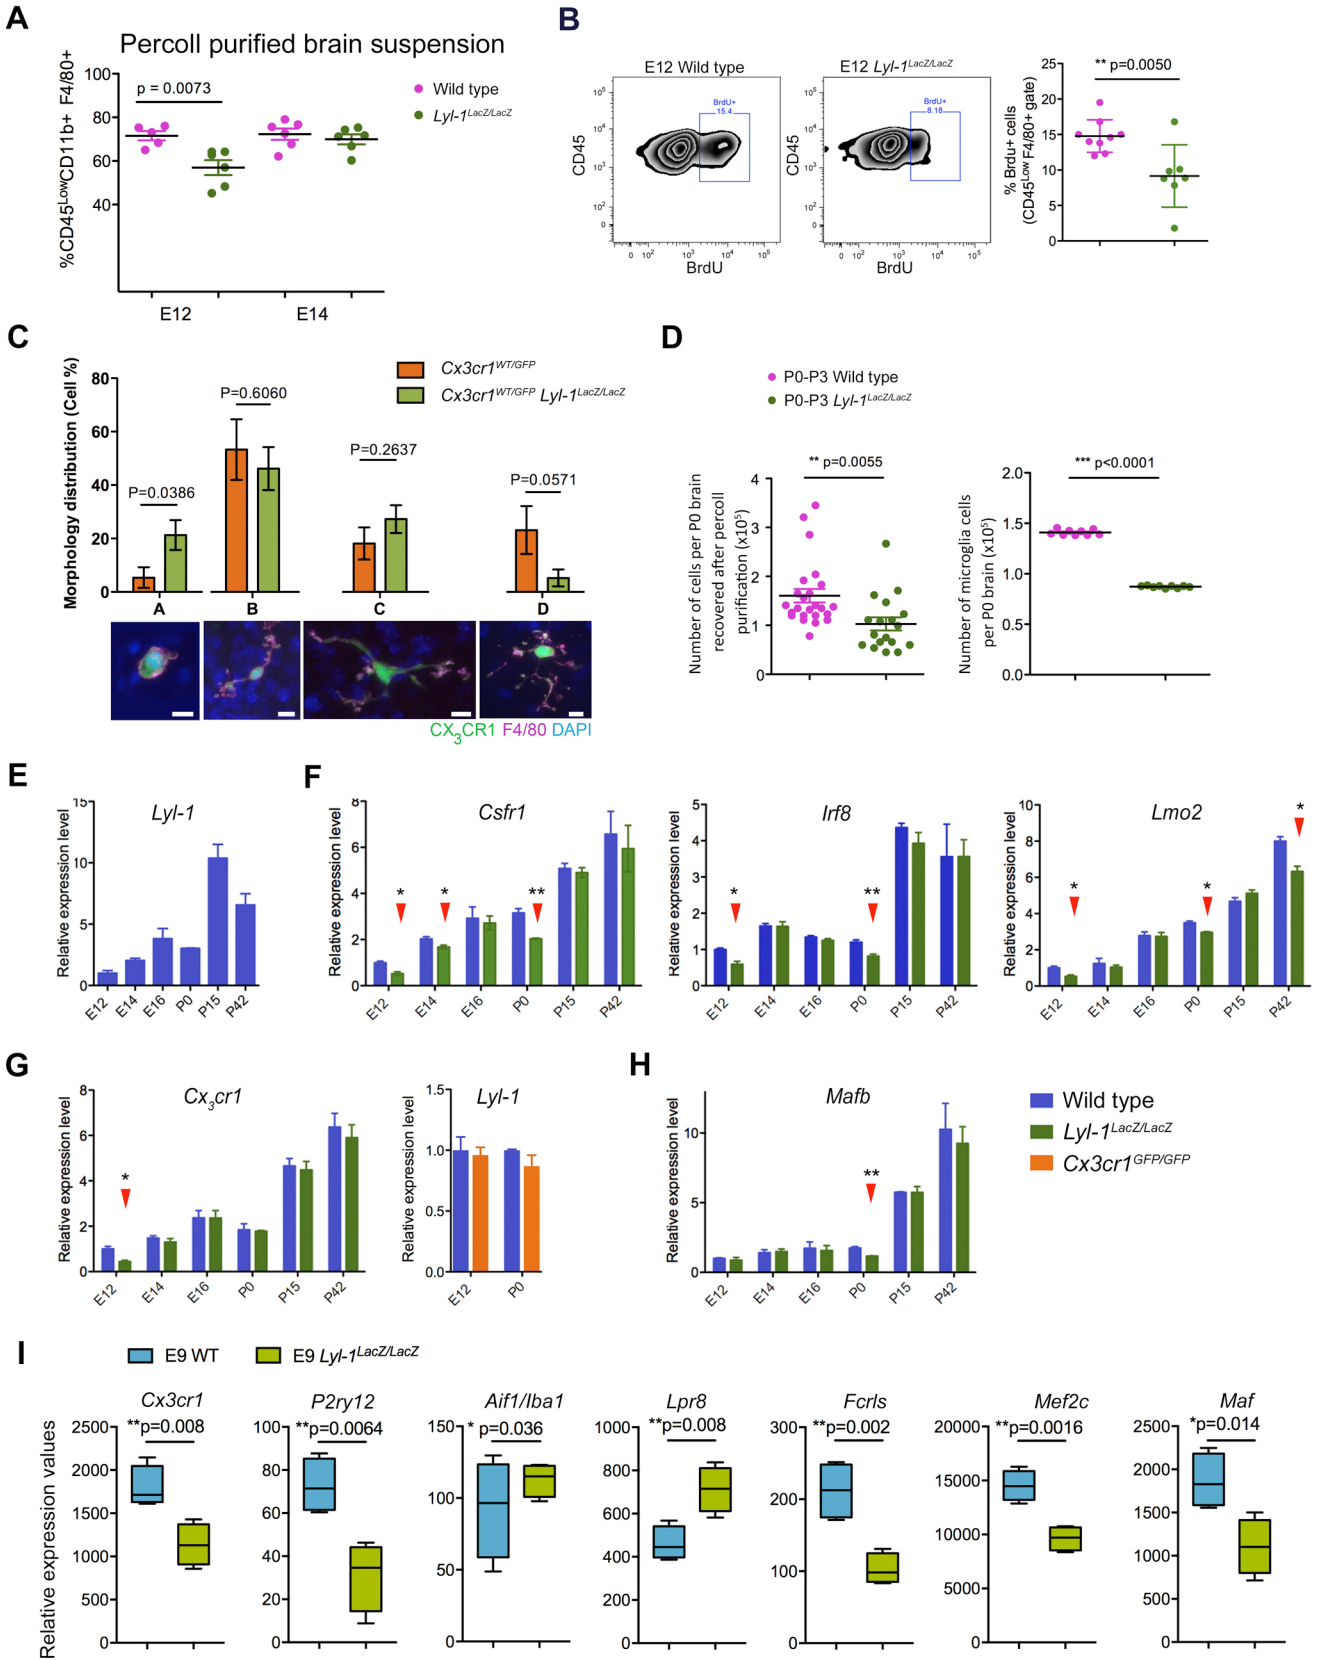

Source: https://www.biorxiv.org/content/biorxiv/early/2021/05/04/2020.09.28.316570.full.pdf
